# Supplementary material for: Effectiveness of Dietary Management for Moderate Wasting among Children > 6 Months of Age—A Systematic Review and Meta-Analysis Exploring Different Types, Quantities, and Durations
Source: MDPI journal article supplement (doi:10.3390/nu15051076), 2023-02-21
Supplement: s1 [file s1]

**Supplementary Figure S46. Forest plot of Enhanced FBF compared to locally produced FBFs - Outcome: Deterioration to severe wasting during the intervention period**

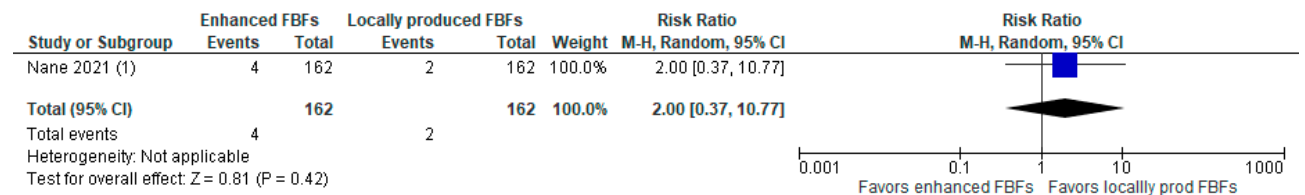

**Footnotes**

(1) CSB+ vs. local ingredients based supplement (LIBS); Deterioration to severe wasting at any point during the intervention.

**Supplementary Figure S47. Forest plot of Enhanced FBF compared to locally produced FBFs - Outcome: WHZ**

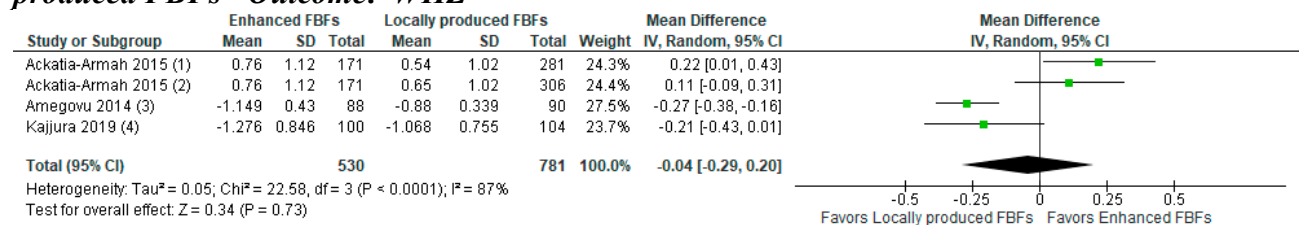

**Footnotes**

- (1) CSB++ vs. locally milled flours (LMF); Change in WHZ during 12 weeks of treatment.
- (2) CSB++ vs. Misola; Change in WHZ during 12 weeks of treatment.
- (3) CSB+ vs. locally produced soy peanut blend (SPB); WHZ at discharge.
- (4) CSB+ vs. Malted sorghum-based porridge (MSBP); WHZ at endline (after 3 months).

**Supplementary Figure S48. Forest plot of Enhanced FBF compared to locally produced FBFs - Outcome: WAZ**

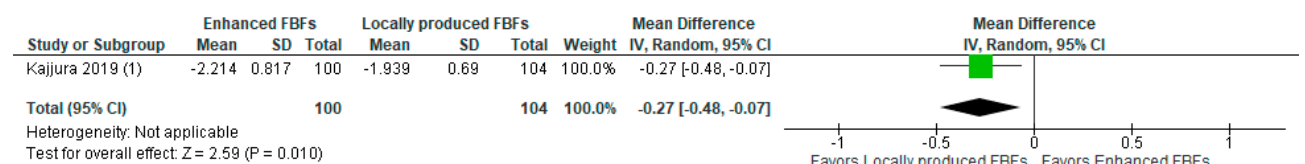

**Footnotes**

- (1) CSB+ vs. Malted sorghum-based porridge (MSBP); WAZ measured at endline (after 3 months).

**Supplementary Figure S49. Forest plot of Enhanced FBF compared to locally produced FBFs - Outcome: HAZ**

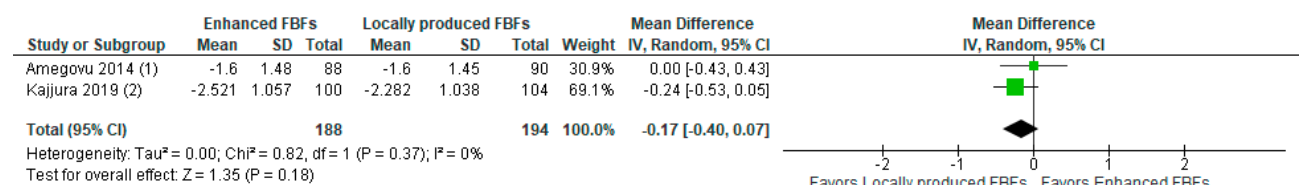

**Footnotes**

- (1) CSB+ vs. locally produced soy peanut blend (SPB); HAZ measured at discharge.
- (2) CSB+ vs. Malted sorghum-based porridge (MSBP); HAZ measured at endline (after 3 months).

**Supplementary Figure S50. Forest plot of Enhanced FBF compared to locally produced FBFs - Outcome: MUAC gain (in cm)**

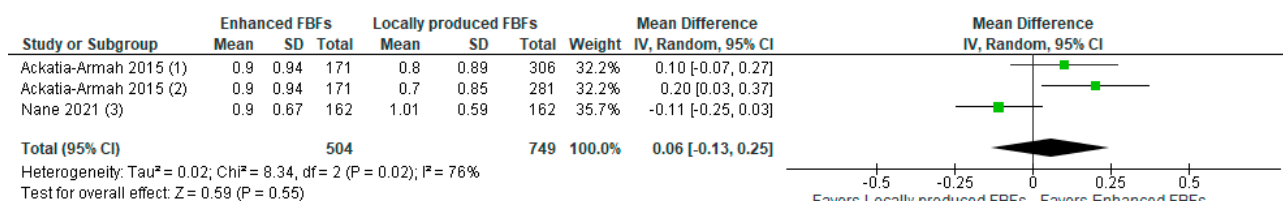

**Footnotes**

- (1) CSB++ vs. misola; MUAC in cm.  
(2) CSB++ vs. locally milled flours (LMF); MUAC in cm.  
(3) CSB+ vs. local ingredients based supplement (LIBS); MUAC in cm.

**Supplementary Figure S51. Forest plot of Enhanced FBF compared to locally produced FBFs - Outcome: Weight gain**

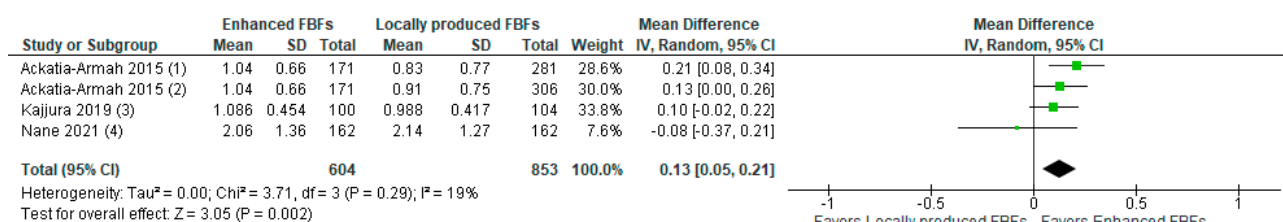

**Footnotes**

- (1) CSB++ vs. locally milled flours (LMF); Weight gain in kg over the intervention period.  
(2) CSB++ vs. misola; Weight gain in kg over the intervention period.  
(3) CSB+ vs. malted sorghum-based porridge (MSBP); Weight gain in kg over the intervention period.  
(4) CSB+ vs. local ingredients based supplement (LIBS); Weight gain in kg over the intervention period.

**Supplementary Figure S52. Forest plot of Enhanced FBF compared to locally produced FBFs - Outcome: Height gain**

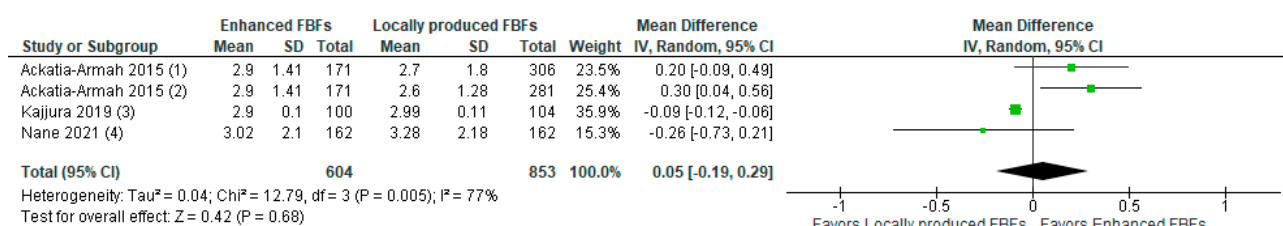

**Footnotes**

- (1) CSB++ vs. misola; Height gain in cm over the intervention period.  
(2) CSB++ vs. locally milled flours (LMF); Height gain in cm over the intervention period.  
(3) CSB+ vs. Malted sorghum-based porridge (MSBP); mean increase in length in cm  
(4) CSB+ vs. local ingredients based supplement (LIBS); increase in height in cm over the intervention period.

**Supplementary Figure S53. Forest plot of Enhanced FBF compared to locally produced FBFs - Outcome: Non-response**

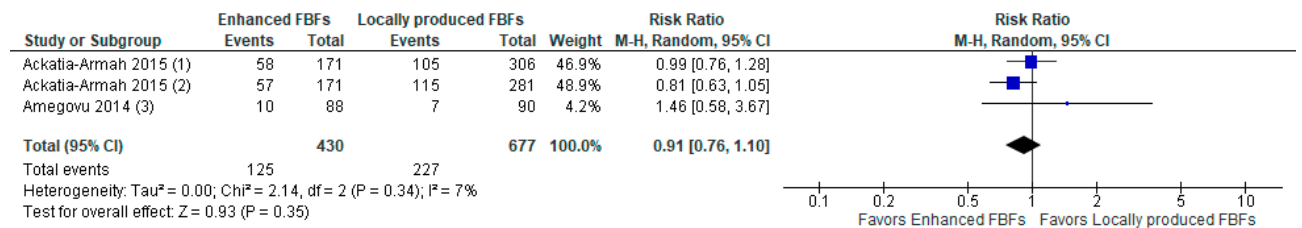

#### Footnotes

- (1) CSB++ vs. Misola; Still MAM after 12 weeks of treatment.  
(2) CSB++ vs. locally milled flours (LMF); Still MAM after 12 weeks of treatment.  
(3) CSB+ vs. locally produced soy peanut blend (SPB). Still MAM after 12 weeks of treatment.

**Supplementary Figure S54. Forest plot of Enhanced FBF compared to locally produced FBFs - Outcome: Time to recovery**

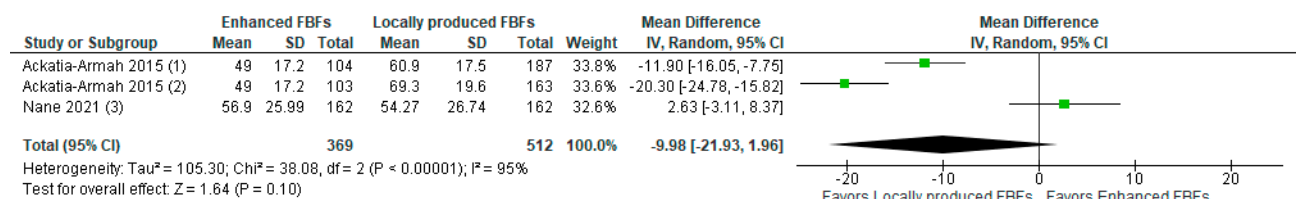

#### Footnotes

- (1) CSB++ vs. Misola; Time to recovery in days.  
(2) CSB++ vs. LMF; Time to recovery in days.  
(3) CSB+ vs. local ingredients based supplement (LIBS); Time to recovery in days.

**Supplementary Figure S55. Forest plot of Enhanced FBFs without milk compared to enhanced FBFs with milk - Outcome: Recovery**

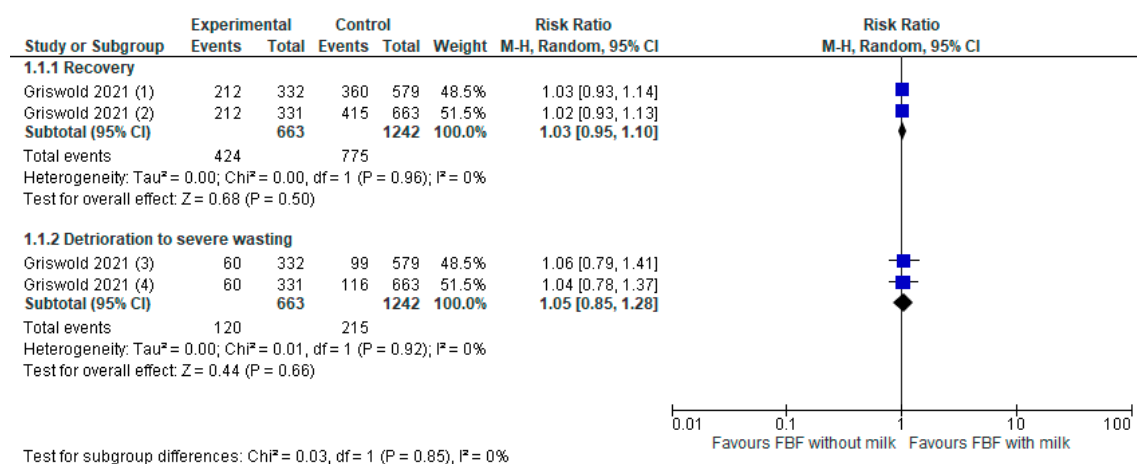

Test for subgroup differences:  $\chi^2 = 0.03$ ,  $df = 1$  ( $P = 0.85$ ),  $I^2 = 0\%$

#### Footnotes

- (1) CSB+ with oil vs CSWB  
(2) CSB+ with oil vs Supercereal+ with Amylase  
(3) CSB+ with oil vs CSWB  
(4) CSB+ with oil vs Supercereal+ with Amylase

**Supplementary Figure S56. Comparison of RUTF vs RUSF - Outcome: Recovery**

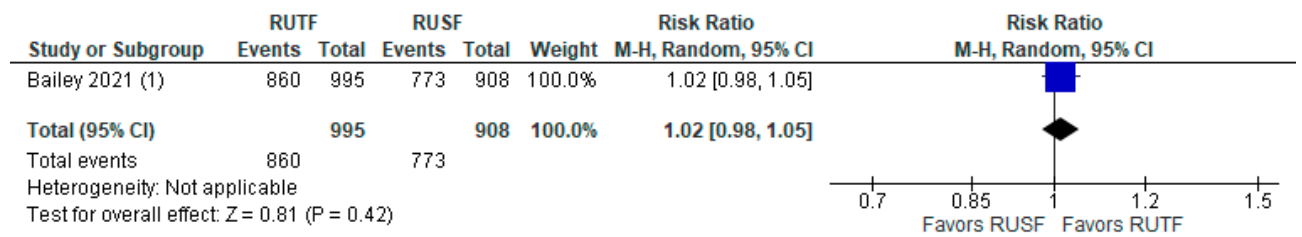

#### Footnotes

(1) Standard RUTF and RUSF; MUAC  $\geq 125$ mm and no oedema

### Supplementary Figure S57. Comparison of RUTF vs RUSF - Outcome: MUAC gain

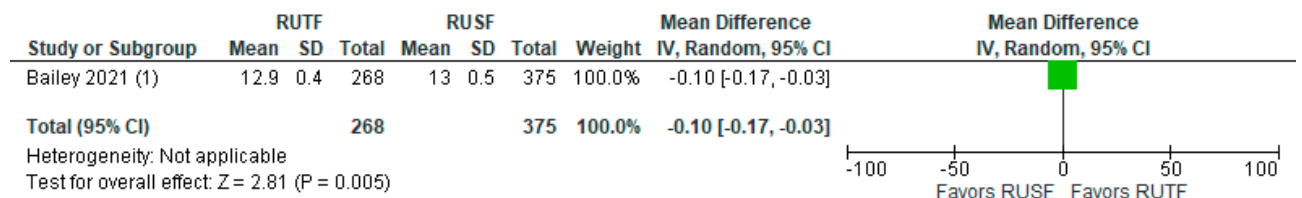

#### Footnotes

(1) Standard RUTF and RUSF; MUAC in cm at discharge. Data from Kenya subsample only.

### Supplementary Figure S58. Comparison of RUTF vs RUSF - Outcome: Weight gain

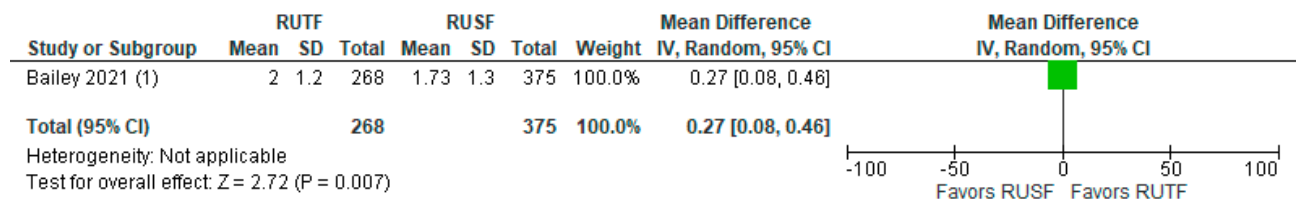

#### Footnotes

(1) Standard RUTF and RUSF; Weight gain in g/kg/day. Data from Kenya subsample only.

### Supplementary Figure S59. Comparison of RUTF vs RUSF - Outcome: Relapse

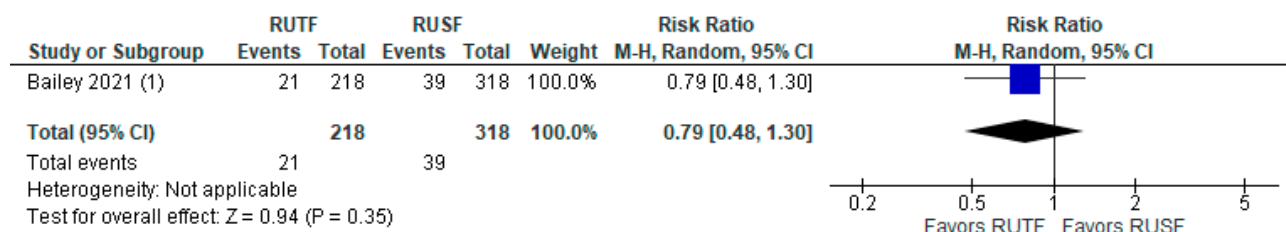

#### Footnotes

(1) Standard RUTF and RUSF; relapse was defined as MAM cases that relapsed back to GAM. Data from Kenya subsample.

### Supplementary Figure S60. Forest plot of RUSF without animal protein vs RUSF with animal protein - Outcome: Recovery rate

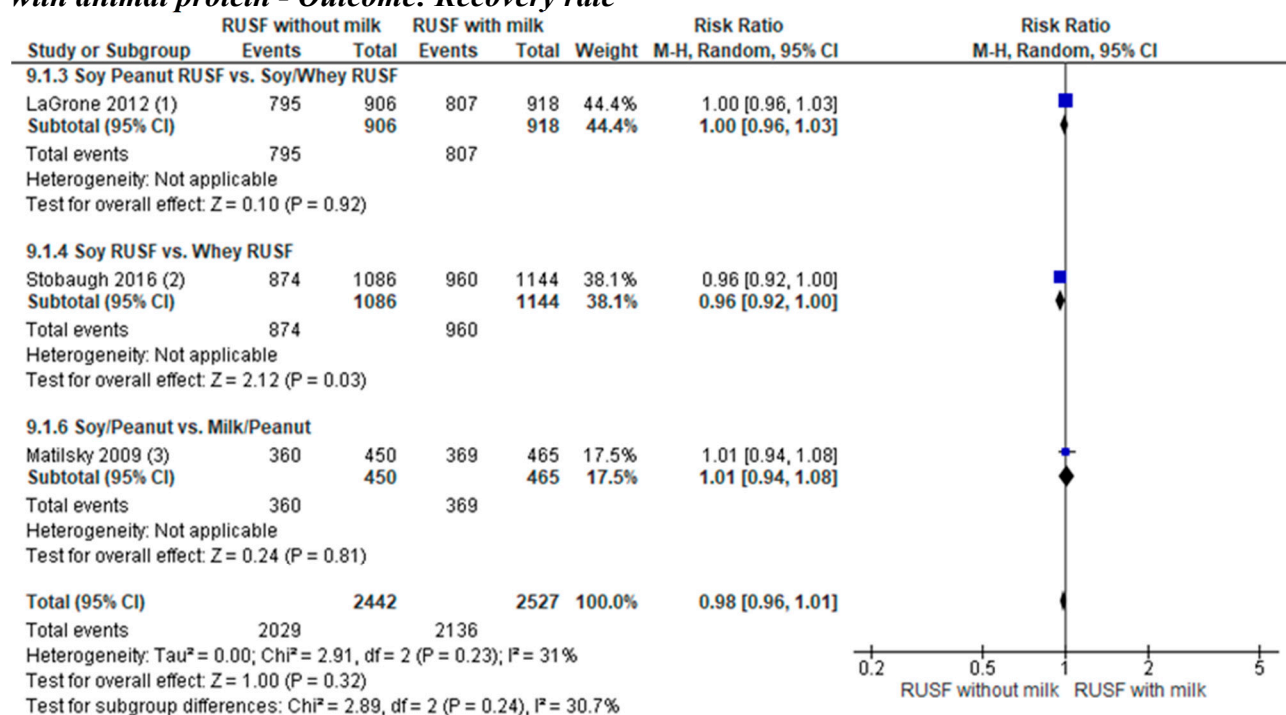

#### Footnotes

(1) Recovered when they reached a WHZ  $\geq -2$

(2) Recovery from MAM, defined as achieving an MUAC of 12.5 cm without bi pedal edema within 12 wk of therapy

(3) Defined as having a WHZ  $> -2$

**Supplementary Figure S61. Forest plot of RUSF without animal protein vs RUSF with animal protein - Outcome: Deterioration to severe wasting**

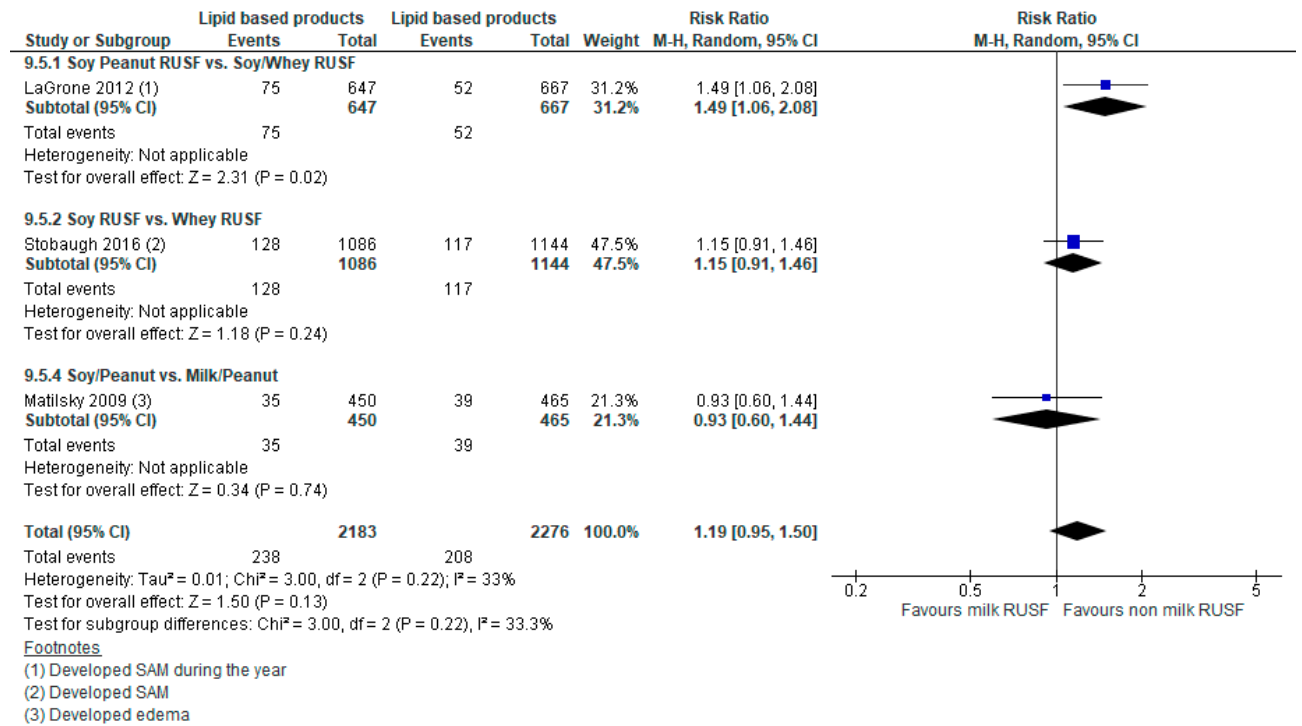

**Supplementary Figure S62. Forest plot of RUSF without animal protein vs RUSF with animal protein - Outcome: WHZ score**

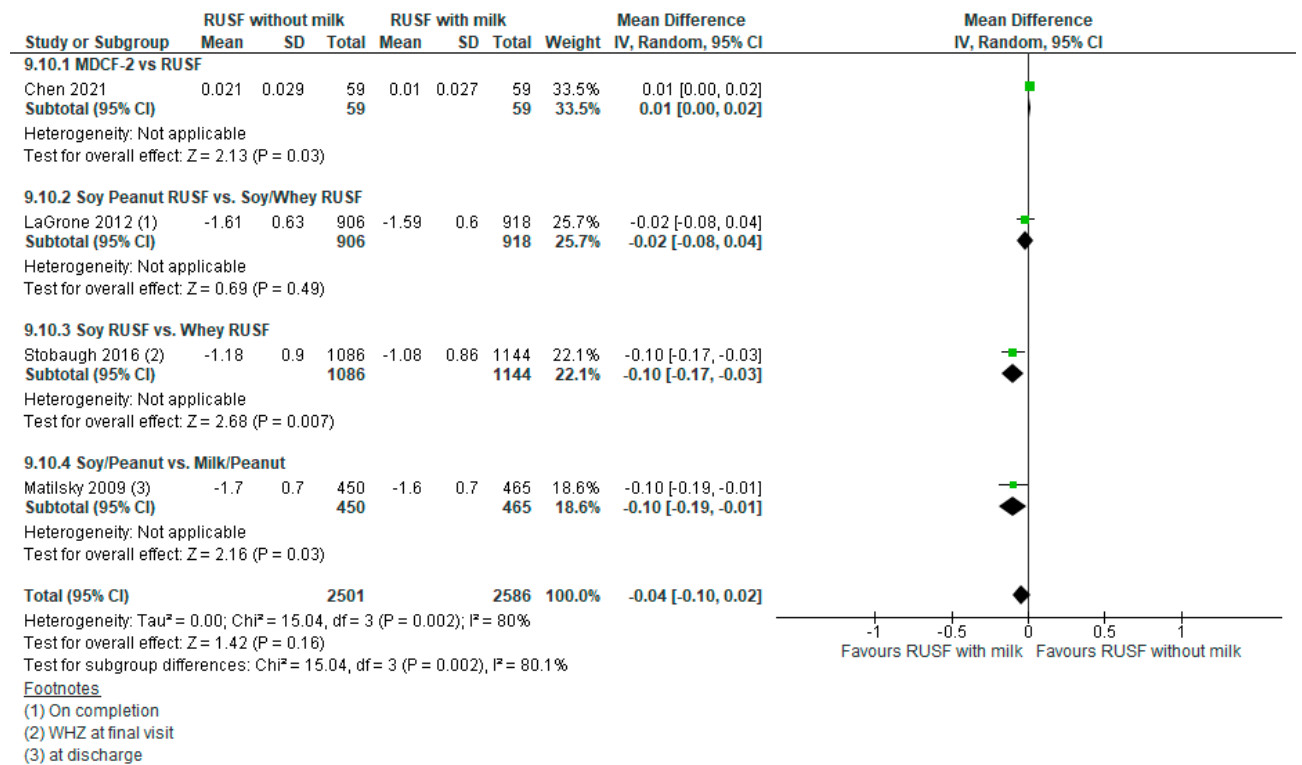

**Supplementary Figure S63. Forest plot of RUSF without animal protein vs RUSF with animal protein - Outcome: WAZ**

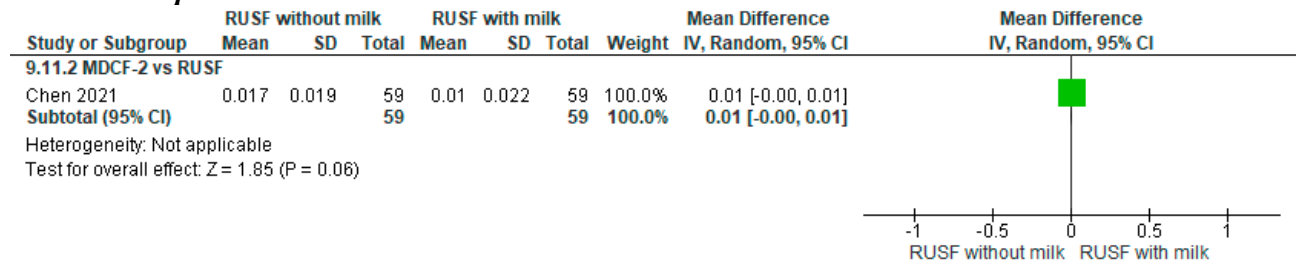

**Supplementary Figure S64. Forest plot of RUSF without animal protein vs RUSF with animal protein - Outcome: HAZ**

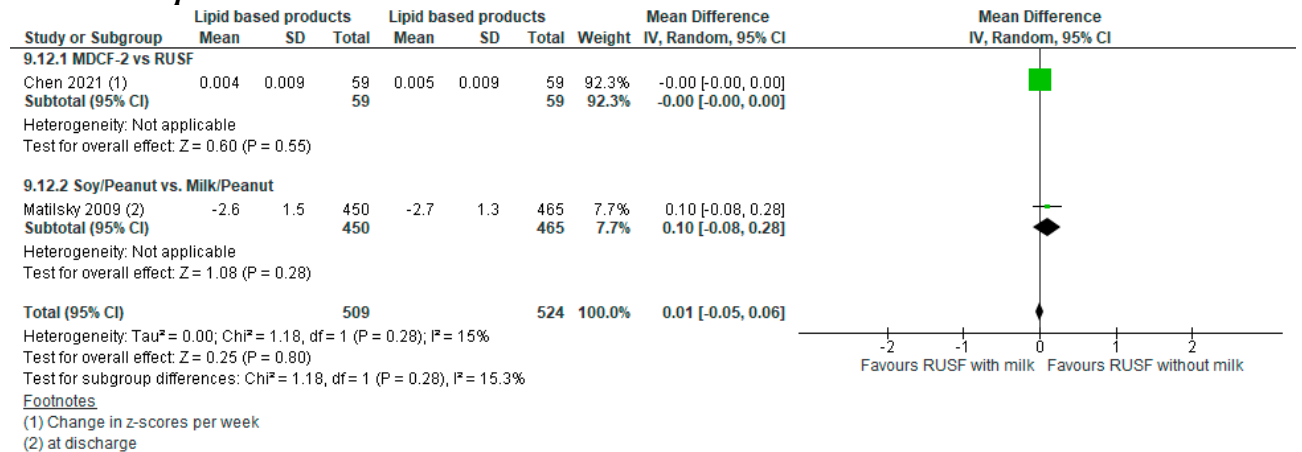

**Supplementary Figure S65. Forest plot of RUSF without animal protein vs RUSF with animal protein - Outcome: MUAC gain**

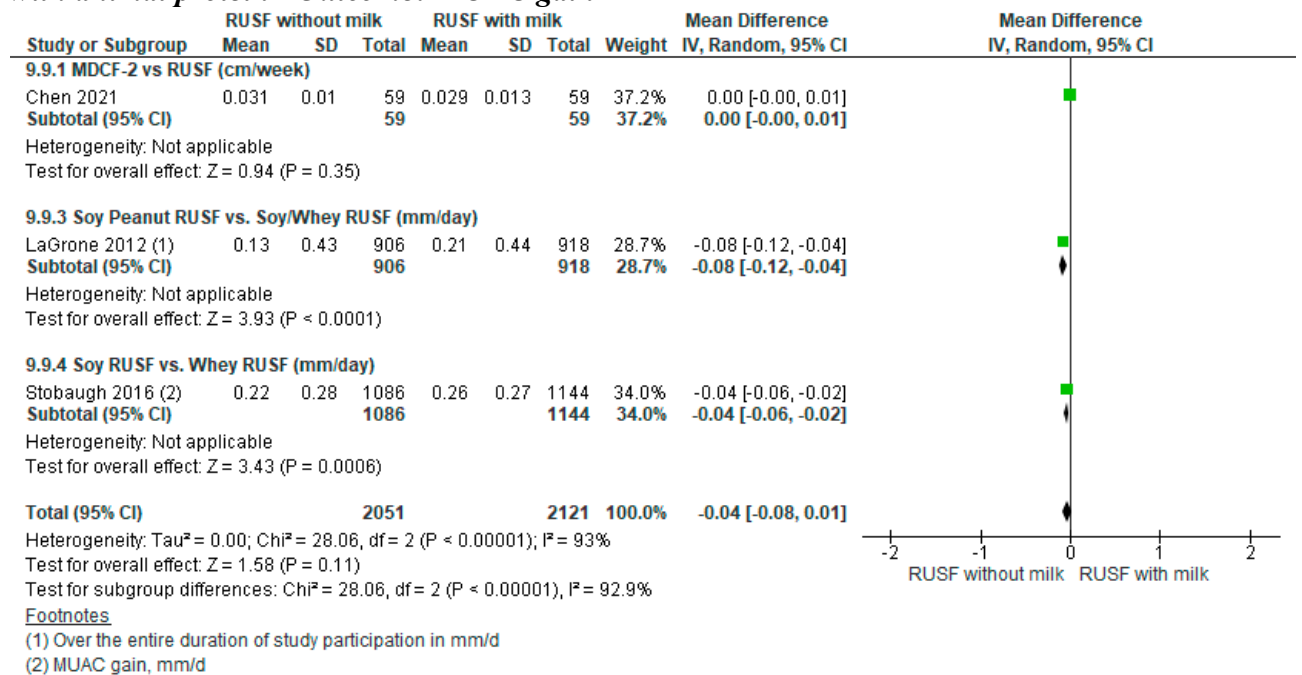



**Supplementary Figure S66. Forest plot of RUSF without animal protein vs RUSF with animal protein - Outcome: Weight gain**

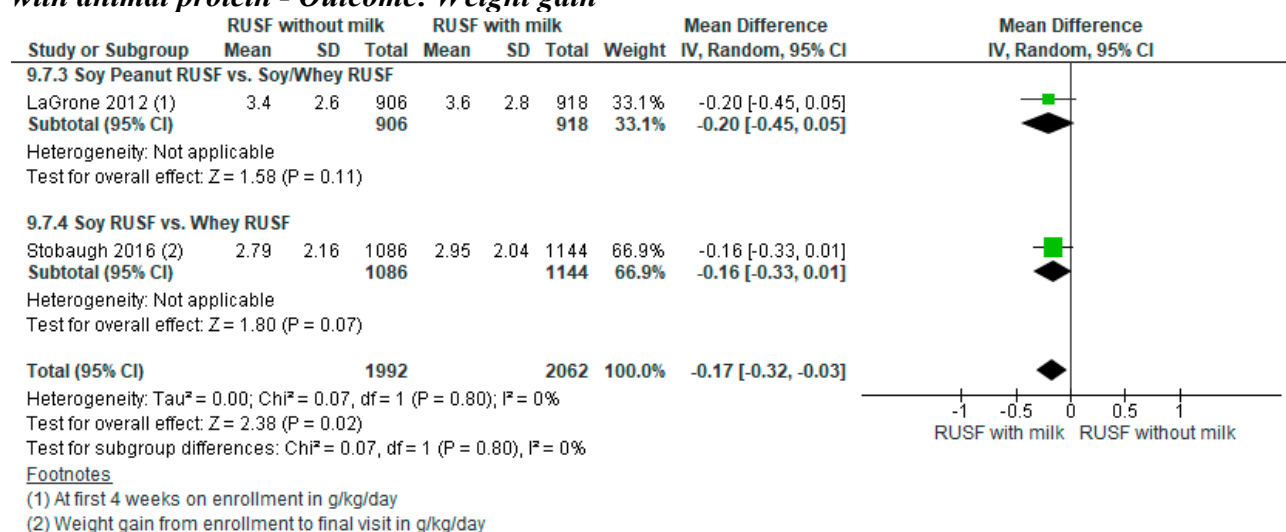

**Supplementary Figure S67. Forest plot of RUSF without animal protein vs RUSF with animal protein - Outcome: Height gain**

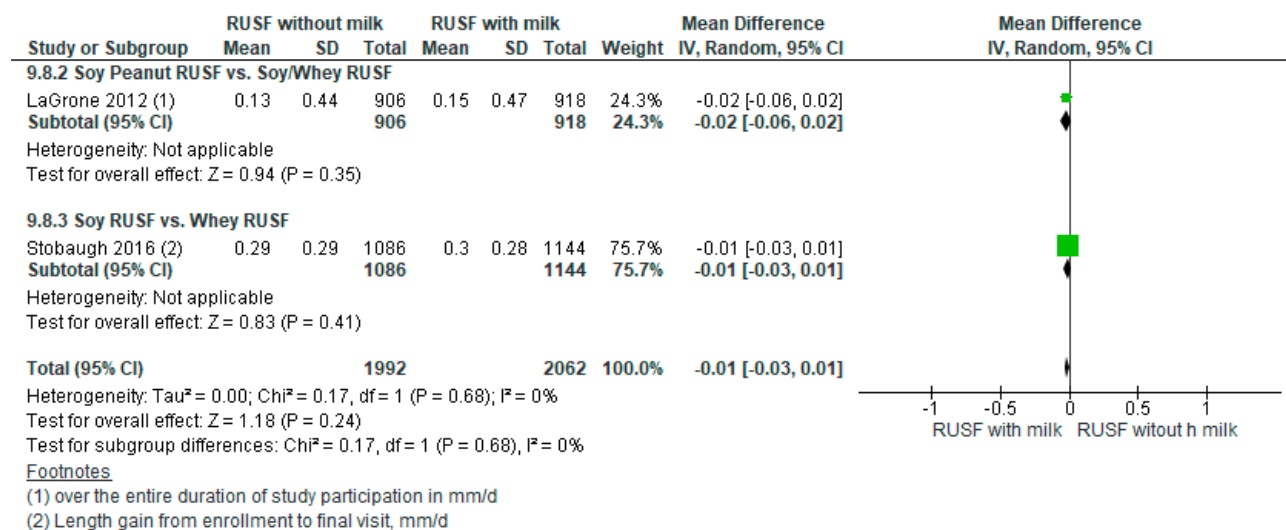

**Supplementary Figure S68. Forest plot of RUSF without animal protein vs RUSF with animal protein - Outcome: Sustained recovery**

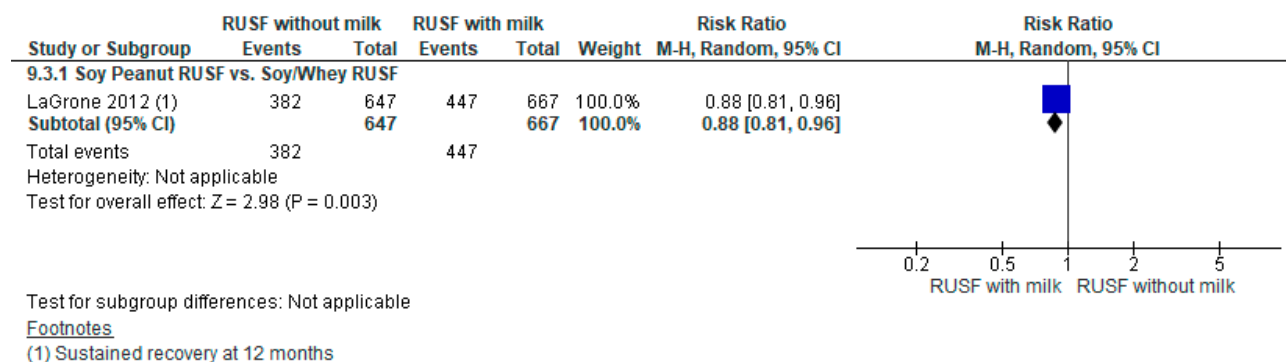



**Supplementary Figure S69. Forest plot of RUSF without animal protein vs RUSF with animal protein - Outcome: Non-response**

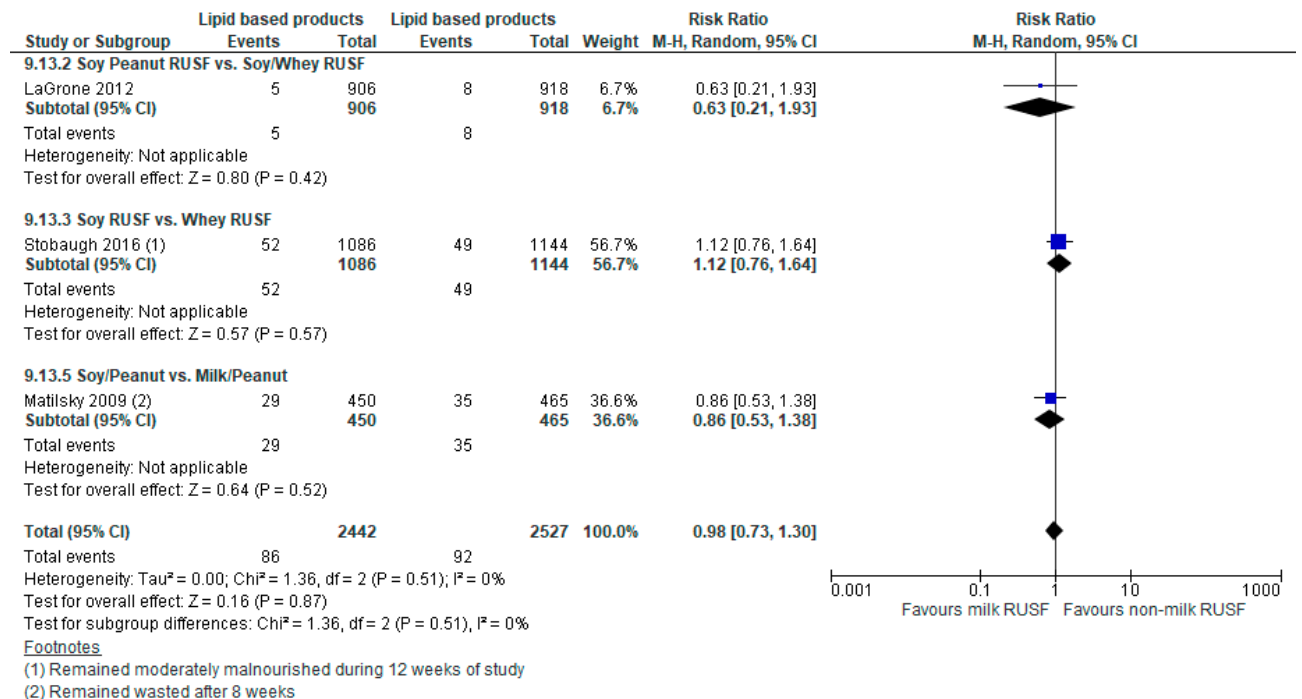

**Supplementary Figure S70. Forest plot of RUSF without animal protein vs RUSF with animal protein - Outcome: Time to recovery**

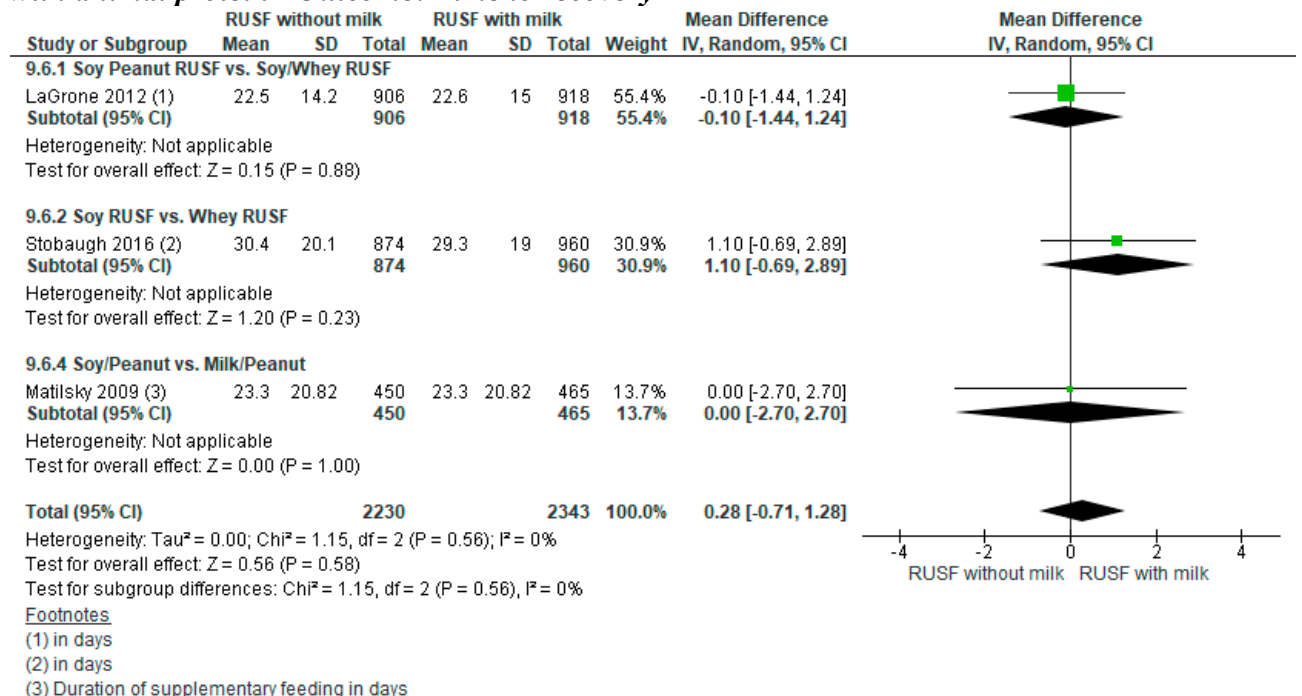

**Supplementary Figure S71. Forest plot of RUSF without animal protein vs RUSF with animal protein - Outcome: Relapse**

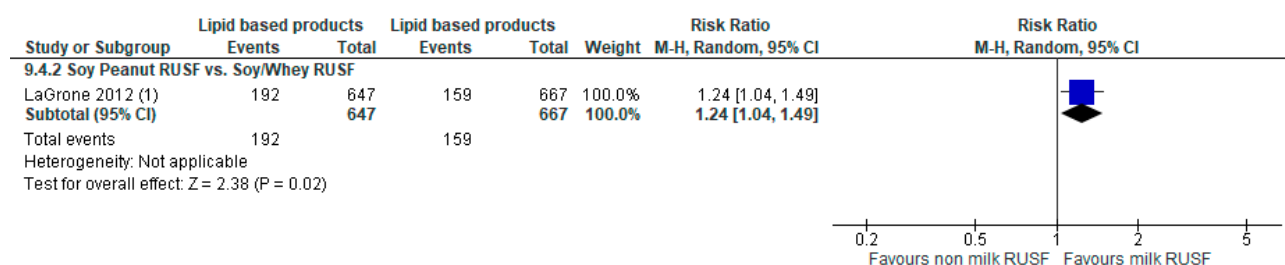

#### Footnotes

(1) Defined as WHZ <-2, but >= -3 and MUAC <12.5 cm; children who recovered from MAM 12 mo after enrollment plus who deteriorated to SAM

## Supplementary Figure S72: Forest plot of protein-optimised RUSF vs RUSF - Dichotomous outcome: Anthropometric recovery rate, deterioration to SAM and non-response

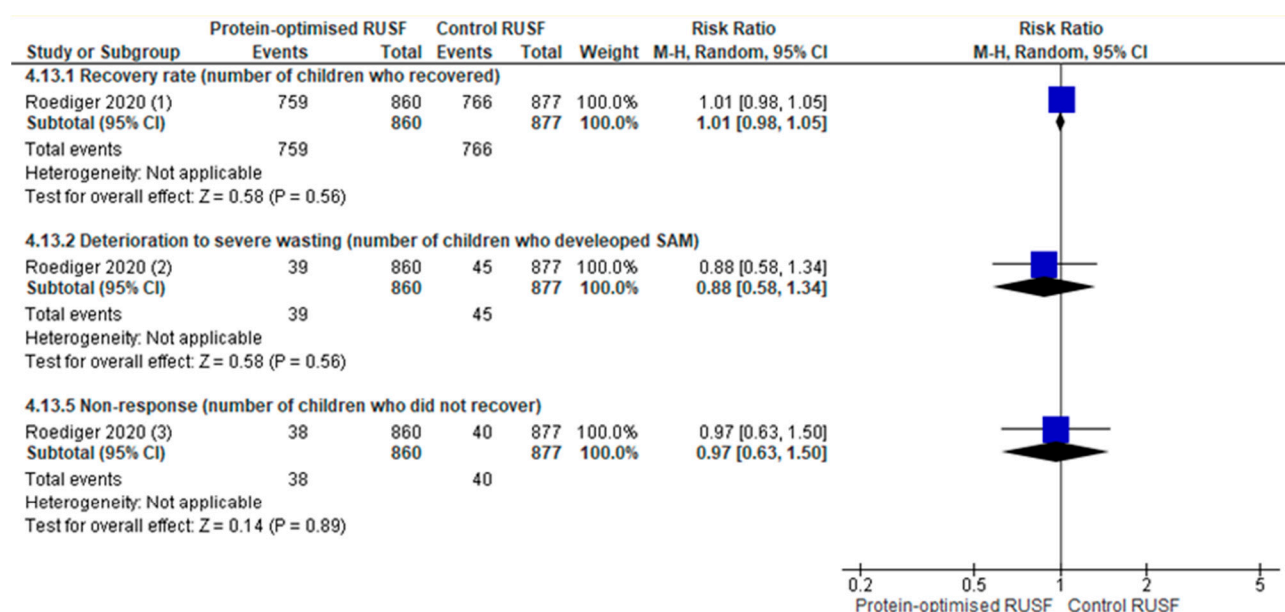

#### Footnotes

(1) Achieving a MUAC greater than or equal to 12.5 cm or a WHZ greater than or equal to -2 within 12 weeks of treatment

(2) Developed SAM

(3) Remained MAM in 12 weeks

## Supplementary Figure S73: Forest plot of protein-optimised RUSF vs RUSF - Dichotomous outcome: MUAC gain, Weight gain, Time to recovery

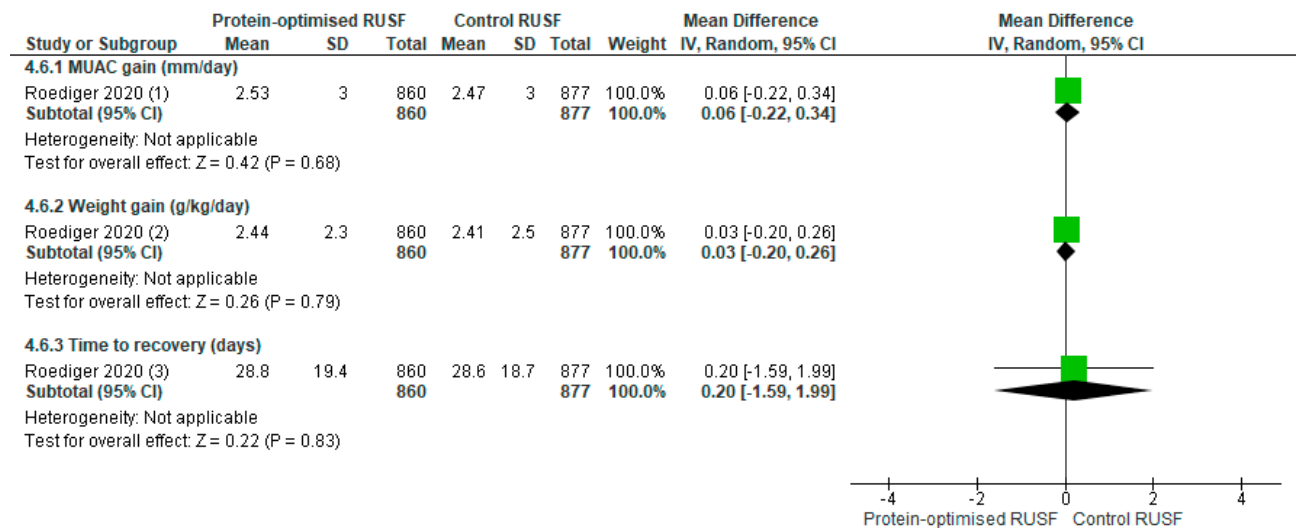

#### Footnotes

- (1) average MUAC gain mm  
(2) Rate of weight gain at outcome assessment in g/kg/day  
(3) in days

**Supplementary Figure S74: Forest plot of RUTF vs alternative RUTF - Outcome: Anthropometric recovery rate**

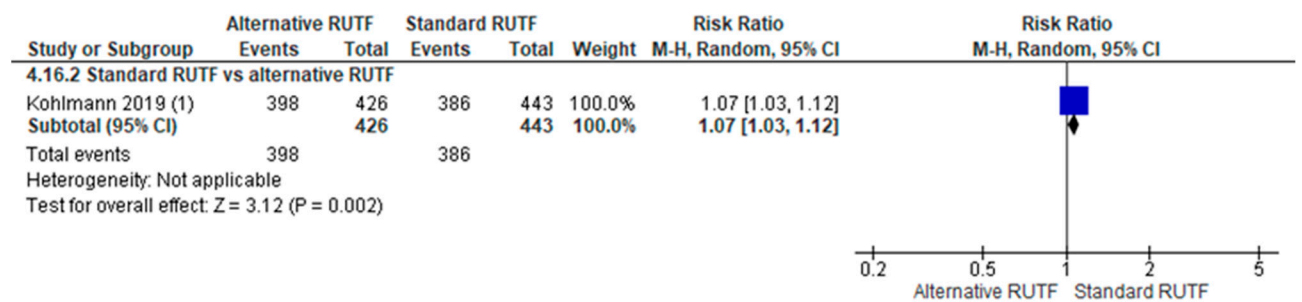

#### Footnotes

- (1) Proportion of children having achieved either WLZ >-2 or MUAC >12.4 cm at any point during the treatment

**Supplementary Figure S75: Forest plot of RUTF vs alternative RUTF - Anthropometric outcome: Weight and MUAC gain**

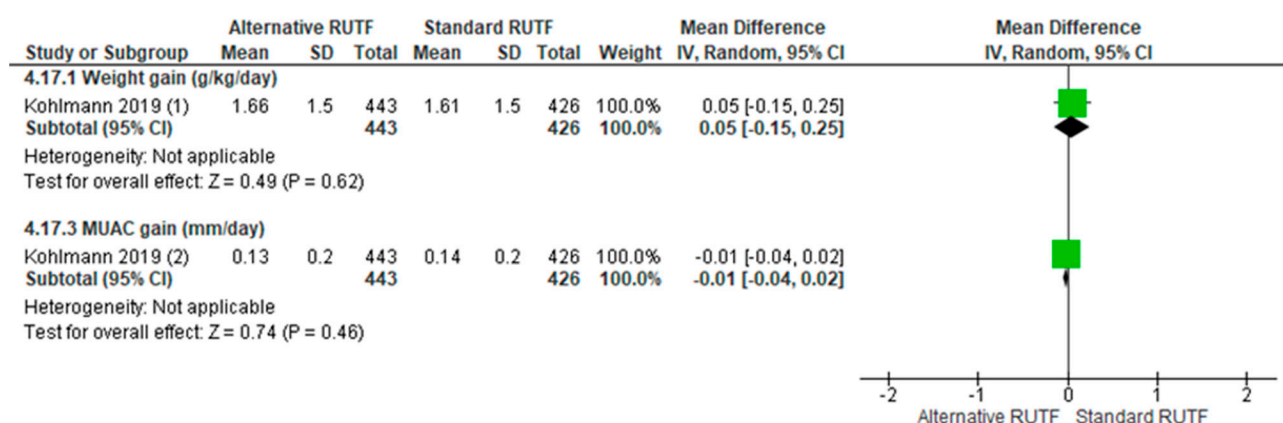

#### Footnotes

(1) Rate of weight gain in g /kg/ d for first 4 weeks of treatment

(2) Rate of MUAC gain (mm/d)

**Supplementary Figure S76. Meta-regression of the relationship between RUTF dose and anthropometric recovery<sup>1</sup>**

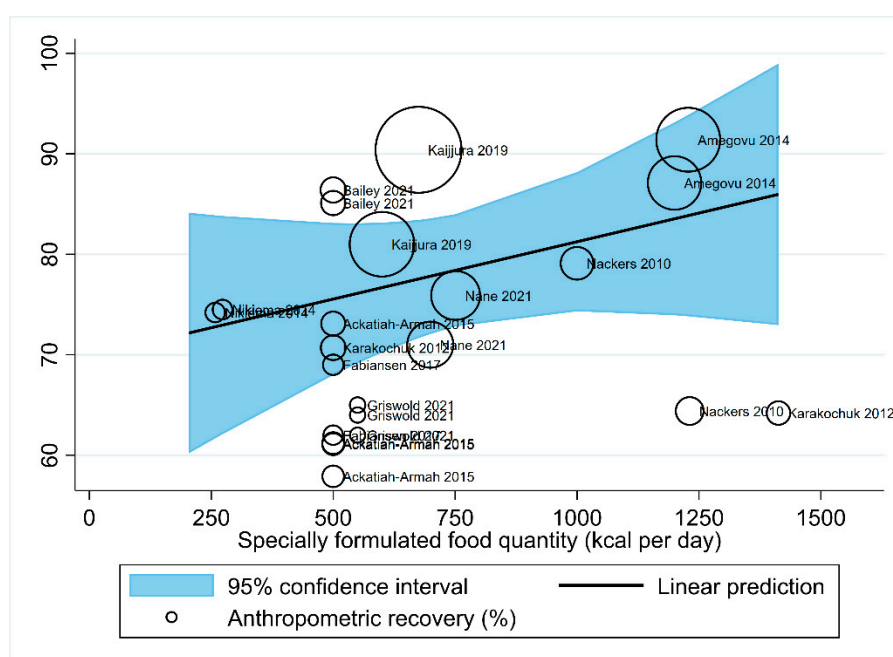

<sup>1</sup>The bubble sizes are proportional to the inverse of the study-level variance for anthropometric recovery.

**Supplementary Figure S77. Meta-regression of the relationship between RUTF dose and MUAC gain.**

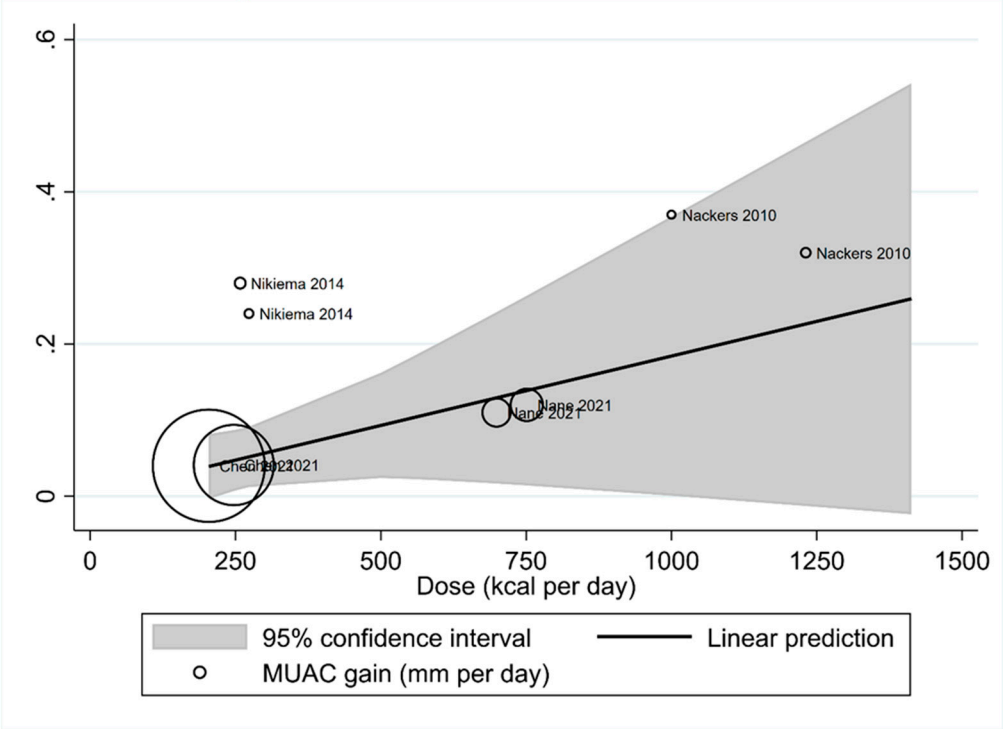

The bubble sizes are proportional to the inverse of the study-level variance for MUAC gain.

**Supplementary Figure S78. Meta-regression of the relationship between fixed RUTF duration and anthropometric recovery**

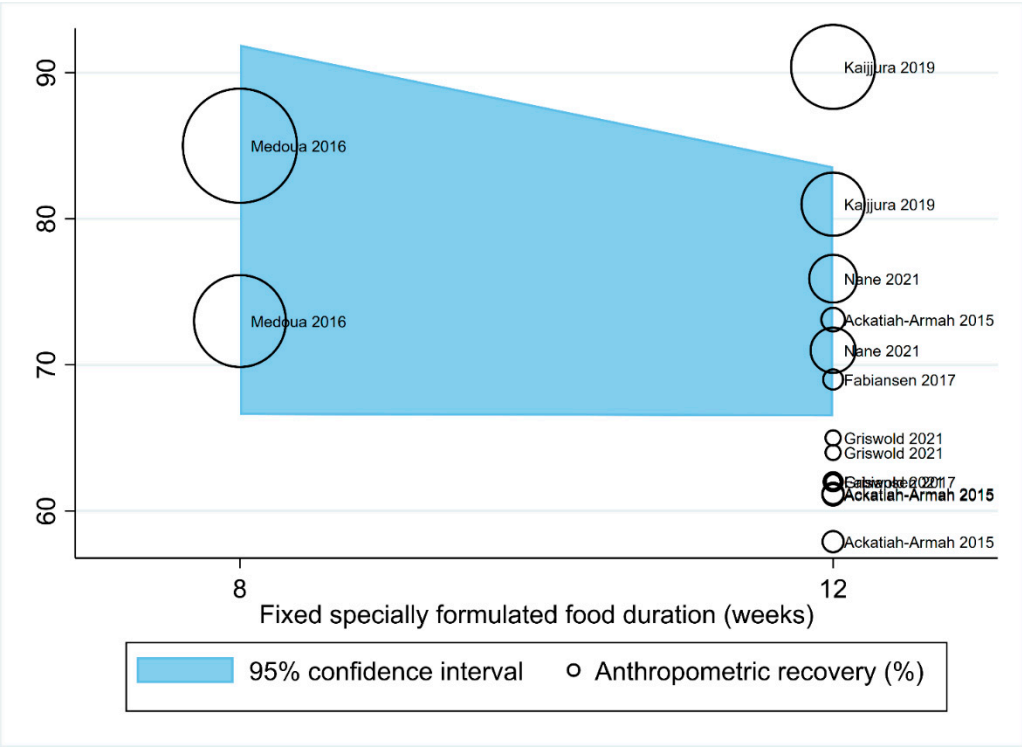

The bubble sizes are proportional to the inverse of the study-level variance for anthropometric recovery.
