# Supplementary material for: Effectiveness of Dietary Management for Moderate Wasting among Children > 6 Months of Age—A Systematic Review and Meta-Analysis Exploring Different Types, Quantities, and Durations
Source: MDPI journal article supplement (doi:10.3390/nu15051076), 2023-02-21
Supplement: s1 [file s1]

## Annex 3. Supplementary tables

**Supplementary Table S1. Search strategy**

| <b>Children</b>                                                                                                                                                                                                                                                          | <b>A<br/>N<br/>D</b> | <b>Wasting</b>                                                                                                                                                                                                                                                                                                                                                                                                                                                                                                                                                                      | <b>A<br/>N<br/>D</b> | <b>Intervention</b>                                                                                                                                                                                                                                                                                                                                                                                                                                                                                                                                                                                                                                                                                                                                                                                                                                                                                                                                                                                                                                                                                                                                                                                                                                                            |
|--------------------------------------------------------------------------------------------------------------------------------------------------------------------------------------------------------------------------------------------------------------------------|----------------------|-------------------------------------------------------------------------------------------------------------------------------------------------------------------------------------------------------------------------------------------------------------------------------------------------------------------------------------------------------------------------------------------------------------------------------------------------------------------------------------------------------------------------------------------------------------------------------------|----------------------|--------------------------------------------------------------------------------------------------------------------------------------------------------------------------------------------------------------------------------------------------------------------------------------------------------------------------------------------------------------------------------------------------------------------------------------------------------------------------------------------------------------------------------------------------------------------------------------------------------------------------------------------------------------------------------------------------------------------------------------------------------------------------------------------------------------------------------------------------------------------------------------------------------------------------------------------------------------------------------------------------------------------------------------------------------------------------------------------------------------------------------------------------------------------------------------------------------------------------------------------------------------------------------|
| “Infant”<br>[MeSH] OR<br>“Child”<br>[MeSH] OR<br>Infant* OR<br>toddler* OR<br>baby OR<br>babies OR<br>preschool<br>OR<br>kindergarte<br>n OR<br>under-5*<br>OR “under<br>5*” OR<br>under-five<br>OR “under<br>five” OR<br>kid OR kids<br>OR<br>paediatr*<br>OR pediater* |                      | “Malnutrition”<br>[MeSH] OR “infant<br>nutrition disorders”<br>[MeSH] OR “protein-<br>energy malnutrition”<br>[MeSH] OR “wasting<br>syndrome” [MeSH]<br>OR malnourish* OR<br>undernutrition OR<br>wasting OR “Acute<br>Malnutrition”[MeSH]<br>OR MAM OR<br>undernutrition OR<br>under-nutrition OR<br>underweight OR<br>wast* OR “weight for<br>height” OR “weight-<br>for-height” OR<br>“weight for length”<br>OR “weight-for-<br>length” OR “weight<br>for age” OR “weight-<br>for-age” OR “mid-<br>upper arm<br>circumference” OR<br>“mid upper arm<br>circumference” OR<br>MUAC |                      | “Food” [MeSH] OR “infant food” [MeSH] OR<br>“food, fortified” [MeSH] OR “food, fomulated”<br>[MeSH] OR “dietary supplements” [MeSH] OR<br>“dietary fat*” [MeSH] OR “Milk Proteins” [Mesh]<br>OR “fortified food*” OR diet* OR supplement*<br>OR “ready to use therapeutic food” OR RUTF OR<br>“ready to use supplementary food” OR RUSF OR<br>“ready to use food” OR RUF OR f1000 OR F75<br>OR CTC OR “micronutrient* supplement*” OR<br>fat* OR “dietary fat*” OR “dietary protein*” OR<br>FBF OR “corn soy” OR “Wheat soy* blend*” OR<br>“Rice milk blend*” OR “Milk rice blend*” OR<br>“Pea wheat blend*” OR “Cereal pulse blend*”<br>OR “Lipid-based nutrient supplement*” OR<br>Nutributter OR CSB OR Supercereal* OR (diet*<br>adj3 supplement*) OR (supplement* adj3 food*)<br>OR "ready to use" OR ready-to-use OR RUTF OR<br>RUSF OR RUF OR F100 OR F75 OR CTC OR<br>FBF OR CMAM OR “community based<br>management” OR “community-based<br>management” OR “integrated community case<br>management” OR ICCM OR “integrated<br>management of acute malnutrition” OR IMAM<br>OR “inpatient management” OR “in-patient<br>management” OR IMCI OR IMNCI OR “facility<br>based management” OR “facility-based<br>management” OR “supplementary feeding<br>program*” OR SFP |

Population: Children with moderate wasting

## Comparison: LNS<sup>2</sup>

Settings: Rural Mali, rural Burkina Faso, Sierra Leone, Malawi, Cameroon

| Certainty assessment |              |              |               |              |             |                      | № of patients                                       |     | Effect            |                   | Certainty | Importance |
|----------------------|--------------|--------------|---------------|--------------|-------------|----------------------|-----------------------------------------------------|-----|-------------------|-------------------|-----------|------------|
| № of studies         | Study design | Risk of bias | Inconsistency | Indirectness | Imprecision | Other considerations | Enhanced commercially produced and/or imported FBFs | LNS | Relative (95% CI) | Absolute (95% CI) |           |            |

|   |                   |                      |             |             |                      |      |                   |                   |                           |                                                  |             |          |
|---|-------------------|----------------------|-------------|-------------|----------------------|------|-------------------|-------------------|---------------------------|--------------------------------------------------|-------------|----------|
| 6 | randomised trials | serious <sup>a</sup> | not serious | not serious | serious <sup>b</sup> | none | 3205/4660 (68.8%) | 3425/4461 (76.8%) | RR 0.96<br>(0.93 to 1.00) | 31 fewer per 1,000<br>(from 54 fewer to 0 fewer) | ⊕⊕○○<br>Low | CRITICAL |
|---|-------------------|----------------------|-------------|-------------|----------------------|------|-------------------|-------------------|---------------------------|--------------------------------------------------|-------------|----------|

|   |                   |                      |             |             |             |      |                                    |                                    |   |                                             |                  |          |
|---|-------------------|----------------------|-------------|-------------|-------------|------|------------------------------------|------------------------------------|---|---------------------------------------------|------------------|----------|
| 3 | randomised trials | serious <sup>a</sup> | not serious | not serious | not serious | none | 1271<br>Mean (SD): -1.46<br>(0.72) | 2199<br>Mean (SD): -1.36<br>(0.72) | - | MD 0.09 lower<br>(0.14 lower to 0.04 lower) | ⊕⊕⊕○<br>Moderate | CRITICAL |
|---|-------------------|----------------------|-------------|-------------|-------------|------|------------------------------------|------------------------------------|---|---------------------------------------------|------------------|----------|

[illegible]

Difference in HAZ at the end of the intervention period – not reported

|   |   |   |   |   |   |   |   |   |   |   |   |          |
|---|---|---|---|---|---|---|---|---|---|---|---|----------|
| - | - | - | - | - | - | - | - | - | - | - | - | CRITICAL |
|---|---|---|---|---|---|---|---|---|---|---|---|----------|

MUAC gain in cm over the intervention period<sup>5</sup>

|   |                   |                      |             |             |                      |      |                              |                               |   |                                             |             |          |
|---|-------------------|----------------------|-------------|-------------|----------------------|------|------------------------------|-------------------------------|---|---------------------------------------------|-------------|----------|
| 3 | randomised trials | serious <sup>a</sup> | not serious | not serious | serious <sup>c</sup> | none | 1271<br>Mean (SD): 0.9 (3.2) | 2199<br>Mean (SD): 1.16 (3.2) | - | MD 0.26 lower<br>(0.48 lower to 0.03 lower) | ⊕⊕○○<br>Low | CRITICAL |
|---|-------------------|----------------------|-------------|-------------|----------------------|------|------------------------------|-------------------------------|---|---------------------------------------------|-------------|----------|

Weight gain in g/kg/day

|   |                   |                      |             |             |                      |      |                                |                               |   |                                             |             |          |
|---|-------------------|----------------------|-------------|-------------|----------------------|------|--------------------------------|-------------------------------|---|---------------------------------------------|-------------|----------|
| 3 | randomised trials | serious <sup>a</sup> | not serious | not serious | serious <sup>d</sup> | none | 1271<br>Mean (SD): 2.49 (2.93) | 2199<br>Mean (SD): 2.84 (2.9) | - | MD 0.36 lower<br>(0.56 lower to 0.15 lower) | ⊕⊕○○<br>Low | CRITICAL |
|---|-------------------|----------------------|-------------|-------------|----------------------|------|--------------------------------|-------------------------------|---|---------------------------------------------|-------------|----------|

Height gain in cm over the intervention period<sup>5</sup>

|   |                   |                      |             |             |             |      |                               |                               |   |                                             |                  |          |
|---|-------------------|----------------------|-------------|-------------|-------------|------|-------------------------------|-------------------------------|---|---------------------------------------------|------------------|----------|
| 2 | randomised trials | serious <sup>a</sup> | not serious | not serious | not serious | none | 1230<br>Mean (SD): 2.33 (2.5) | 2159<br>Mean (SD): 2.35 (2.5) | - | MD 0.02 lower<br>(0.2 lower to 0.15 higher) | ⊕⊕⊕○<br>Moderate | CRITICAL |
|---|-------------------|----------------------|-------------|-------------|-------------|------|-------------------------------|-------------------------------|---|---------------------------------------------|------------------|----------|

Sustained recovery<sup>6</sup>

|   |                   |                      |             |             |                      |      |                 |                  |                           |                                                 |             |           |
|---|-------------------|----------------------|-------------|-------------|----------------------|------|-----------------|------------------|---------------------------|-------------------------------------------------|-------------|-----------|
| 1 | randomised trials | serious <sup>a</sup> | not serious | not serious | serious <sup>c</sup> | none | 405/653 (62.0%) | 828/1314 (63.0%) | RR 0.99<br>(0.87 to 1.11) | 6 fewer per 1,000<br>(from 82 fewer to 69 more) | ⊕⊕○○<br>Low | IMPORTANT |
|---|-------------------|----------------------|-------------|-------------|----------------------|------|-----------------|------------------|---------------------------|-------------------------------------------------|-------------|-----------|

Deterioration to severe wasting<sup>7</sup>

|   |                   |                      |             |             |             |      |                  |                  |                           |                                                |                  |           |
|---|-------------------|----------------------|-------------|-------------|-------------|------|------------------|------------------|---------------------------|------------------------------------------------|------------------|-----------|
| 5 | randomised trials | serious <sup>a</sup> | not serious | not serious | not serious | none | 537/4074 (13.2%) | 409/3625 (11.3%) | RR 1.03<br>(0.86 to 1.23) | 3 more per 1,000<br>(from 12 fewer to 20 more) | ⊕⊕⊕○<br>Moderate | IMPORTANT |
|---|-------------------|----------------------|-------------|-------------|-------------|------|------------------|------------------|---------------------------|------------------------------------------------|------------------|-----------|

|  |  |  |  |  |  |  |  |  |  |  |  |  |
|--|--|--|--|--|--|--|--|--|--|--|--|--|
|  |  |  |  |  |  |  |  |  |  |  |  |  |
|--|--|--|--|--|--|--|--|--|--|--|--|--|

Time to recovery in days

|   |                   |                      |                      |             |                      |      |                                     |                                     |   |                                                 |                  |           |
|---|-------------------|----------------------|----------------------|-------------|----------------------|------|-------------------------------------|-------------------------------------|---|-------------------------------------------------|------------------|-----------|
| 4 | randomised trials | serious <sup>a</sup> | serious <sup>f</sup> | not serious | Serious <sup>g</sup> | none | 1641<br>Mean (SD): 36.38<br>(52.79) | 2624<br>Mean (SD): 33.18<br>(52.79) | - | MD 3.2 higher<br>(0.06 lower to 6.45<br>higher) | ⊕○○○<br>Very low | IMPORTANT |
|---|-------------------|----------------------|----------------------|-------------|----------------------|------|-------------------------------------|-------------------------------------|---|-------------------------------------------------|------------------|-----------|

Non-response<sup>8</sup>

|   |                   |                      |                      |             |                      |      |                     |                     |                           |                                                    |             |           |
|---|-------------------|----------------------|----------------------|-------------|----------------------|------|---------------------|---------------------|---------------------------|----------------------------------------------------|-------------|-----------|
| 5 | randomised trials | serious <sup>a</sup> | serious <sup>h</sup> | not serious | Serious <sup>i</sup> | none | 398/2746<br>(14.5%) | 412/3702<br>(11.1%) | RR 1.10<br>(0.81 to 1.50) | 11 more per 1,000<br>(from 21 fewer to 56<br>more) | ⊕⊕○○<br>Low | IMPORTANT |
|---|-------------------|----------------------|----------------------|-------------|----------------------|------|---------------------|---------------------|---------------------------|----------------------------------------------------|-------------|-----------|

Relapse<sup>9</sup>

|   |                   |                      |             |             |                      |      |                 |                     |                           |                                                    |             |           |
|---|-------------------|----------------------|-------------|-------------|----------------------|------|-----------------|---------------------|---------------------------|----------------------------------------------------|-------------|-----------|
| 1 | randomised trials | Serious <sup>j</sup> | not serious | not serious | serious <sup>k</sup> | none | 173/653 (26.5%) | 351/1314<br>(26.7%) | RR 0.99<br>(0.81 to 1.22) | 3 fewer per 1,000<br>(from 51 fewer to 59<br>more) | ⊕⊕○○<br>Low | IMPORTANT |
|---|-------------------|----------------------|-------------|-------------|----------------------|------|-----------------|---------------------|---------------------------|----------------------------------------------------|-------------|-----------|

<sup>1</sup>CI: confidence interval; MD: mean difference; RR: risk ratio; WHZ: Weight-for-Height Z-score; HAZ: Height-for-age Z-score; WAZ: Weight-for-age z-score; MUAX: Mid-upper arm circumference; <sup>2</sup>LNS was chosen as comparator because it is a common comparator across the 3 meta-analysis under comparison 1. <sup>3</sup> Out of the 6 studies included, 3 defined recovery from MAM as reaching a WHZ  $\geq -2$  (Nikiema et al., 2014, Medoua et al., 2016; LaGrone et al., 2012); one study defined recovery as reaching a MUAC of  $\geq 12.5$ cm (Griswold et al., 2021), one as reaching a WHZ  $\geq -2$  and MUAC  $\geq 12.5$ cm (Fabiansen et al., 2017); one study defined recovery as reaching a WHZ  $\geq -2$  and MUAC  $\geq 12.5$ cm at two consecutive follow-up visits (Ackatiah-Armah et al., 2014); <sup>4</sup>2 studies reported WHZ and HAZ at the end of the intervention while 1 reported change throughout the intervention period; <sup>5</sup> In two studies the intervention period was 12 weeks (Ackatiah-Armah et al., 2014, LaGrone et al., 2012) and in one study the intervention period was 8 weeks (Medoua et al., 2016); <sup>6</sup>sustained recovery at 12 months; <sup>7</sup>Developing SAM during the intervention period based either on WHZ  $< -3$ , MUAC  $< 11.5$ cm and oedema criteria (Fabiansen et al., 2017, Ackatiah-Armah et al., 2014), MUAC  $< 11.5$  and oedema criteria (Griswold et al., 2021) or WHZ  $< -3$  and oedema criteria (Nikiema et al., 2014, Medoua et al., 2016; LaGrone et al., 2012); <sup>8</sup>remained MAM at the end of the intervention period of 12 weeks (Fabiansen et al., 2017, Nikiema et al., 2014, Ackatiah-Armah et al., 2015, LaGrone et al., 2012) or 8 weeks (Medoua et al., 2016); <sup>9</sup>Relapsed to MAM during a 12 months follow-up period.

### Explanations for Evidence Grade

a. Serious risk of bias: majority or all information is from studies at high or unclear overall risk of bias.

b. Serious imprecision: Absolute effect crosses the null threshold, effect ranges from small harm to no difference.

c. Serious imprecision: 95% CI around the absolute effect does not cross the null, however effect ranges from moderate to trivial harm.

- d. Serious imprecision: 95% CI around the absolute effect does not cross the null threshold, however the 95% CI ranges from a trivial to a small harm
- e. Serious imprecision: 95% CI around the absolute effect crosses the null threshold and effect ranges from small benefit to small harms.
- f. Considerable inconsistency: I<sup>2</sup>=93%
- g. Serious imprecision: the 95% CI around the absolute effect crosses the null, ranges include trivial benefit to appreciable harm
- h. Not necessary to double downgrade for inconsistency and imprecision.
- i. Serious imprecision: 95% CI around the absolute effect crosses the null threshold, effect ranges from trivial benefit to small harms.

### Supplementary Table S3. Evidence Profile for comparison 1.b. CSB vs LNS<sup>1</sup>

**Population:** 6-60 months old children with moderate wasting

**Intervention:** Corn soy blend

**Comparison:** LNS

**Settings:** Rural Niger, Malawi and Ethiopia

| Certainty assessment                                |                   |                      |               |              |                      |                      | № of patients            |                                        | Effect                 |                                                 | Certainty        | Importance |
|-----------------------------------------------------|-------------------|----------------------|---------------|--------------|----------------------|----------------------|--------------------------|----------------------------------------|------------------------|-------------------------------------------------|------------------|------------|
| № of studies                                        | Study design      | Risk of bias         | Inconsistency | Indirectness | Imprecision          | Other considerations | Corn Soy Blend (CSB)     | Lipid based nutrient supplements (LNS) | Relative (95% CI)      | Absolute (95% CI)                               |                  |            |
| Anthropometric recovery at 8-16 weeks <sup>3</sup>  |                   |                      |               |              |                      |                      |                          |                                        |                        |                                                 |                  |            |
| 3                                                   | randomised trials | serious <sup>a</sup> | not serious   | not serious  | serious <sup>b</sup> | none                 | 957/1433 (66.8%)         | 1164/1505 (77.3%)                      | RR 0.89 (0.85 to 0.94) | 85 fewer per 1,000 (from 116 fewer to 46 fewer) | ⊕⊕○○<br>Low      | CRITICAL   |
| WHZ at discharge (after up to 8 weeks of treatment) |                   |                      |               |              |                      |                      |                          |                                        |                        |                                                 |                  |            |
| 1                                                   | randomised trials | not serious          | not serious   | not serious  | serious <sup>b</sup> | none                 | 915<br>Mean z-score:-1.8 | 447<br>Mean z-score:-1.65              | -                      | MD 0.15 lower (0.25 lower to 0.5 lower)         | ⊕⊕⊕○<br>Moderate | CRITICAL   |

| Certainty assessment |              |              |               |              |             |                      | № of patients        |                                        | Effect            |                   | Certainty | Importance |
|----------------------|--------------|--------------|---------------|--------------|-------------|----------------------|----------------------|----------------------------------------|-------------------|-------------------|-----------|------------|
| № of studies         | Study design | Risk of bias | Inconsistency | Indirectness | Imprecision | Other considerations | Corn Soy Blend (CSB) | Lipid based nutrient supplements (LNS) | Relative (95% CI) | Absolute (95% CI) |           |            |

**HAZ at discharge (after up to 8 weeks of treatment)**

|   |                   |             |             |             |                      |      |                          |                           |   |                                              |                                                                                                 |          |
|---|-------------------|-------------|-------------|-------------|----------------------|------|--------------------------|---------------------------|---|----------------------------------------------|-------------------------------------------------------------------------------------------------|----------|
| 1 | randomised trials | not serious | not serious | not serious | serious <sup>b</sup> | none | 447<br>Mean zscore: -2.8 | 915<br>Mean zscore: -2.65 | - | MD 0.15 lower<br>(0.35 lower to 0.05 higher) | <br>Moderate | CRITICAL |
|---|-------------------|-------------|-------------|-------------|----------------------|------|--------------------------|---------------------------|---|----------------------------------------------|-------------------------------------------------------------------------------------------------|----------|

**MUAC gain (mm/day)**

|   |                   |                      |             |             |             |      |                                  |                                  |   |                                              |                                                                                                 |          |
|---|-------------------|----------------------|-------------|-------------|-------------|------|----------------------------------|----------------------------------|---|----------------------------------------------|-------------------------------------------------------------------------------------------------|----------|
| 1 | randomised trials | serious <sup>c</sup> | not serious | not serious | not serious | none | 150<br>Mean (SD):<br>0.32 (0.24) | 162<br>Mean (SD): 0.37<br>(0.29) | - | MD 0.05 lower<br>(0.11 lower to 0.01 higher) | <br>Moderate | CRITICAL |
|---|-------------------|----------------------|-------------|-------------|-------------|------|----------------------------------|----------------------------------|---|----------------------------------------------|-------------------------------------------------------------------------------------------------|----------|

### Weight gain (g/kg/day) in the first two weeks of treatment

|   |                   |                      |             |             |             |      |                                  |                                  |   |                                             |                                                                                                 |          |
|---|-------------------|----------------------|-------------|-------------|-------------|------|----------------------------------|----------------------------------|---|---------------------------------------------|-------------------------------------------------------------------------------------------------|----------|
| 1 | randomised trials | serious <sup>c</sup> | not serious | not serious | not serious | none | 217<br>Mean (SD):<br>3.48 (4.32) | 204<br>Mean (SD): 5.34<br>(4.15) | - | MD 1.86 lower<br>(2.67 lower to 1.05 lower) | <br>Moderate | CRITICAL |
|---|-------------------|----------------------|-------------|-------------|-------------|------|----------------------------------|----------------------------------|---|---------------------------------------------|-------------------------------------------------------------------------------------------------|----------|

**Height gain – not measured**

[illegible]

**Sustained recovery – not measured**

[illegible]Deterioration to severe wasting during the intervention period<sup>4</sup>

| Certainty assessment |                   |                      |               |              |                      |                      | Nº of patients       |                                        | Effect                           |                                                        | Certainty   | Importance |
|----------------------|-------------------|----------------------|---------------|--------------|----------------------|----------------------|----------------------|----------------------------------------|----------------------------------|--------------------------------------------------------|-------------|------------|
| Nº of studies        | Study design      | Risk of bias         | Inconsistency | Indirectness | Imprecision          | Other considerations | Corn Soy Blend (CSB) | Lipid based nutrient supplements (LNS) | Relative (95% CI)                | Absolute (95% CI)                                      |             |            |
| 3                    | randomised trials | serious <sup>a</sup> | not serious   | not serious  | serious <sup>d</sup> | none                 | 88/1433 (6.1%)       | 100/1505 (6.6%)                        | <b>RR 1.15</b><br>(0.73 to 1.84) | <b>10 more per 1,000</b><br>(from 18 fewer to 56 more) | ⊕⊕○○<br>Low | IMPORTANT  |

#### Non-response<sup>5</sup>

|   |                   |                      |                      |             |                      |      |                     |                  |                                  |                                                         |                  |           |
|---|-------------------|----------------------|----------------------|-------------|----------------------|------|---------------------|------------------|----------------------------------|---------------------------------------------------------|------------------|-----------|
| 3 | randomised trials | serious <sup>a</sup> | serious <sup>f</sup> | not serious | serious <sup>c</sup> | none | 166/1037<br>(16.0%) | 301/1901 (15.8%) | <b>RR 1.27</b><br>(0.68 to 2.36) | <b>43 more per 1,000</b><br>(from 51 fewer to 215 more) | ⊕○○○<br>Very low | IMPORTANT |
|---|-------------------|----------------------|----------------------|-------------|----------------------|------|---------------------|------------------|----------------------------------|---------------------------------------------------------|------------------|-----------|

#### Time to recovery (weeks)

|   |                   |                      |             |             |                      |      |                               |                                 |   |                                          |             |           |
|---|-------------------|----------------------|-------------|-------------|----------------------|------|-------------------------------|---------------------------------|---|------------------------------------------|-------------|-----------|
| 1 | randomised trials | serious <sup>c</sup> | not serious | not serious | serious <sup>c</sup> | none | 152<br>Mean (SD): 8<br>(10.5) | 170<br>Mean (SD): 7.3<br>(10.5) | - | MD 0.7 higher<br>(1.6 lower to 3 higher) | ⊕⊕○○<br>Low | IMPORTANT |
|---|-------------------|----------------------|-------------|-------------|----------------------|------|-------------------------------|---------------------------------|---|------------------------------------------|-------------|-----------|

#### Relapse

|   |                   |                      |             |             |                      |      |                |                |                                  |                                                         |             |           |
|---|-------------------|----------------------|-------------|-------------|----------------------|------|----------------|----------------|----------------------------------|---------------------------------------------------------|-------------|-----------|
| 1 | randomised trials | serious <sup>c</sup> | not serious | not serious | serious <sup>g</sup> | none | 33/152 (21.7%) | 33/170 (19.4%) | <b>RR 1.12</b><br>(0.73 to 1.72) | <b>23 more per 1,000</b><br>(from 52 fewer to 140 more) | ⊕⊕○○<br>Low | IMPORTANT |
|---|-------------------|----------------------|-------------|-------------|----------------------|------|----------------|----------------|----------------------------------|---------------------------------------------------------|-------------|-----------|

<sup>1</sup> **Abbreviations:** **CI:** confidence interval; **MD:** mean difference; **RR:** risk ratio; **WHZ:** Weight-for-Height Z-score; **HAZ:** Height-for-age Z-score; **WAZ:** Weight-for-age z-score; **MUAC:** Mid-upper arm circumference; <sup>2</sup> LNS was chosen as comparator across these three meta-analyses because it is a common comparator across the 3 meta-analysis not necessarily the "standard of care".<sup>3</sup> Recovery criteria varied across the 3 studies: Karakochuck et al. (2012) and Nackers et al (2010) defined recovery as WFH≥85% across 2 consecutive visits; Matilsky et al., (2009) defined recovery as reaching a WHZ≥-2.<sup>4</sup> The intervention period varied between 8 weeks (Matilsky et al.,2009 ) and 16 weeks (Nackers et al., 2010; Karakochuck et al., 2012);<sup>5</sup> Children who remained MAM during the intervention period;

## Explanations for evidence GRADE

- a. Serious risk of bias: Two out of three studies have a high risk of bias
- b. Serious imprecision: Absolute effects cross the null threshold, effects range from trivial benefit to small harm
- c. Serious imprecision: Absolute effects cross the null threshold, effects range from very small benefit to moderate harms.
- d. Serious risk of bias: High risk of bias in the Nackers et al., 2010 study
- e. Serious imprecision: Absolute effects cross the null threshold, effects range from small to trivial difference
- f. Serious inconsistency: Downgraded by one level to variation in point estimates (I2=89%)

- g. Serious imprecision: Absolute effect crosses the null, effect ranges include appreciable benefit and harm.
- h. Serious imprecision: Absolute effect crosses the null, effect ranges from small benefit to moderate harms.



k. Serious imprecision: 95% CI around the absolute effect crosses the null threshold and effect range from small harms to small benefits.

**Supplementary Table S4. Evidence Profile for Comparison 1c (locally produced FBF compared to LNS )<sup>1,2</sup>**

**Population:** 6-35 months old children with moderate wasting

**Intervention:** Locally produced FBFs (Misola and LMF)

### Comparison: RUSF

### Settings: Rural Mali

| Certainty assessment                 |                   |                      |               |              |                          |                      | № of patients         |                 | Effect                 |                                                  | Certainty                                                                                  | Importance |
|--------------------------------------|-------------------|----------------------|---------------|--------------|--------------------------|----------------------|-----------------------|-----------------|------------------------|--------------------------------------------------|--------------------------------------------------------------------------------------------|------------|
| № of studies                         | Study design      | Risk of bias         | Inconsistency | Indirectness | Imprecision              | Other considerations | Locally produced FBFs | LNS             | Relative (95% CI)      | Absolute (95% CI)                                |                                                                                            |            |
| Anthropometric recovery <sup>3</sup> |                   |                      |               |              |                          |                      |                       |                 |                        |                                                  |                                                                                            |            |
| 1                                    | randomised trials | serious <sup>a</sup> | not serious   | not serious  | not serious <sup>b</sup> | None                 | 337/587 (57.4%)       | 234/335 (69.9%) | RR 0.82 (0.74 to 0.91) | 126 fewer per 1,000 (from 182 fewer to 63 fewer) | <br>Low | CRITICAL   |

### Change in WHZ over 12 weeks of treatment

|   |                   |                      |             |             |                      |      |                                 |                                  |   |                                            |                                                                                              |          |
|---|-------------------|----------------------|-------------|-------------|----------------------|------|---------------------------------|----------------------------------|---|--------------------------------------------|----------------------------------------------------------------------------------------------|----------|
| 1 | randomised trials | serious <sup>a</sup> | not serious | not serious | Serious <sup>c</sup> | None | 587<br>Mean (SD): 0.6<br>(1.04) | 335<br>Mean (SD): 0.94<br>(1.04) | - | MD 0.34 lower<br>(0.48 lower to 0.2 lower) | <br>Low | CRITICAL |
|---|-------------------|----------------------|-------------|-------------|----------------------|------|---------------------------------|----------------------------------|---|--------------------------------------------|----------------------------------------------------------------------------------------------|----------|

**Change in WAZ over 12 weeks of treatment – not reported**

[illegible]

**Change in HAZ over 12 weeks of treatment – not reported**

| Certainty assessment |              |              |               |              |             |                      | № of patients         |     | Effect            |                   | Certainty | Importance |
|----------------------|--------------|--------------|---------------|--------------|-------------|----------------------|-----------------------|-----|-------------------|-------------------|-----------|------------|
| № of studies         | Study design | Risk of bias | Inconsistency | Indirectness | Imprecision | Other considerations | Locally produced FBFs | LNS | Relative (95% CI) | Absolute (95% CI) |           |            |
| -                    | -            | -            | -             | -            | -           | -                    | -                     | -   | -                 | -                 | -         | CRITICAL   |

#### Change in MUAC in cm over 12 weeks of treatment

|   |                   |                      |             |             |                      |      |                                  |                                 |   |                                             |             |          |
|---|-------------------|----------------------|-------------|-------------|----------------------|------|----------------------------------|---------------------------------|---|---------------------------------------------|-------------|----------|
| 1 | randomised trials | serious <sup>a</sup> | not serious | not serious | serious <sup>d</sup> | None | 587<br>Mean (SD): 0.75<br>(0.89) | 335<br>Mean (SD): 1.1<br>(0.89) | - | MD 0.35 lower<br>(0.47 lower to 0.23 lower) | ⊕⊕○○<br>Low | CRITICAL |
|---|-------------------|----------------------|-------------|-------------|----------------------|------|----------------------------------|---------------------------------|---|---------------------------------------------|-------------|----------|

#### Weight gain in kg over 12 weeks of treatment

|   |                   |                      |             |             |             |      |                                  |                                  |   |                                             |                  |          |
|---|-------------------|----------------------|-------------|-------------|-------------|------|----------------------------------|----------------------------------|---|---------------------------------------------|------------------|----------|
| 1 | randomised trials | serious <sup>a</sup> | not serious | not serious | not serious | None | 587<br>Mean (SD): 0.87<br>(0.75) | 335<br>Mean (SD): 1.16<br>(0.75) | - | MD 0.29 lower<br>(0.39 lower to 0.19 lower) | ⊕⊕⊕○<br>Moderate | CRITICAL |
|---|-------------------|----------------------|-------------|-------------|-------------|------|----------------------------------|----------------------------------|---|---------------------------------------------|------------------|----------|

#### Height gain in cm over 12 weeks of treatment

|   |                   |                      |             |             |             |      |                                |                                |   |                                             |                  |          |
|---|-------------------|----------------------|-------------|-------------|-------------|------|--------------------------------|--------------------------------|---|---------------------------------------------|------------------|----------|
| 1 | randomised trials | serious <sup>a</sup> | not serious | not serious | not serious | None | 587<br>Mean (SD): 2.6<br>(1.4) | 335<br>Mean (SD): 2.9<br>(1.4) | - | MD 0.26 lower<br>(0.45 lower to 0.06 lower) | ⊕⊕⊕○<br>Moderate | CRITICAL |
|---|-------------------|----------------------|-------------|-------------|-------------|------|--------------------------------|--------------------------------|---|---------------------------------------------|------------------|----------|

#### Sustained recovery – Not measured

|   |   |   |   |   |   |   |   |   |   |   |   |           |
|---|---|---|---|---|---|---|---|---|---|---|---|-----------|
| - | - | - | - | - | - | - | - | - | - | - | - | IMPORTANT |
|---|---|---|---|---|---|---|---|---|---|---|---|-----------|

#### Deterioration to severe wasting – Data not reported by study arm

|   |   |   |   |   |   |   |   |   |   |   |   |           |
|---|---|---|---|---|---|---|---|---|---|---|---|-----------|
| - | - | - | - | - | - | - | - | - | - | - | - | IMPORTANT |
|---|---|---|---|---|---|---|---|---|---|---|---|-----------|

#### Non-response

| Certainty assessment |                   |                      |               |              |                      |                      | N° of patients        |                | Effect                           |                                                         | Certainty   | Importance |
|----------------------|-------------------|----------------------|---------------|--------------|----------------------|----------------------|-----------------------|----------------|----------------------------------|---------------------------------------------------------|-------------|------------|
| N° of studies        | Study design      | Risk of bias         | Inconsistency | Indirectness | Imprecision          | Other considerations | Locally produced FBFs | LNS            | Relative (95% CI)                | Absolute (95% CI)                                       |             |            |
| 1                    | randomised trials | serious <sup>a</sup> | not serious   | not serious  | serious <sup>c</sup> | None                 | 220/587 (37.5%)       | 78/335 (23.3%) | <b>RR 1.61</b><br>(1.29 to 2.01) | <b>142 more per 1,000</b><br>(from 68 more to 235 more) | ⊕⊕○○<br>Low | IMPORTANT  |

Time to recovery in weeks

|   |                   |                      |             |             |                      |      |                                |                                |  |                                                    |             |  |
|---|-------------------|----------------------|-------------|-------------|----------------------|------|--------------------------------|--------------------------------|--|----------------------------------------------------|-------------|--|
| 1 | randomised trials | serious <sup>a</sup> | not serious | not serious | Serious <sup>f</sup> | None | 350<br>Mean (SD): 9.3<br>(8.8) | 245<br>Mean (SD): 5.9<br>(8.8) |  | <b>MD: 3.4 higher</b> (2.22 higher to 4.58 higher) | ⊕⊕○○<br>Low |  |
|---|-------------------|----------------------|-------------|-------------|----------------------|------|--------------------------------|--------------------------------|--|----------------------------------------------------|-------------|--|

Relapse – not measured

|  |  |  |  |  |  |  |  |  |  |  |  |  |
|--|--|--|--|--|--|--|--|--|--|--|--|--|
|  |  |  |  |  |  |  |  |  |  |  |  |  |
|--|--|--|--|--|--|--|--|--|--|--|--|--|

**Footnotes:** <sup>1</sup>CI: confidence interval; MD: mean difference; RR: risk ratio; WHZ: Weight-for-Height Z-score; HAZ: Height-for-age Z-score; WAZ: Weight-for-age z-score; MUAC: Mid-upper arm circumference; <sup>2</sup>LNS was chosen as comparator across these three meta-analyses because it is a common comparator across the 3 meta-analysis not necessarily the "standard of care"; <sup>3</sup> Recovery from MAM defined as reaching WHZ >−2.0 and MUAC >12.5 cm during 2 consecutive follow-up visits.

### Explanations for certainty of evidence

- a. Serious Risk of bias: All information is from one trial with unclear overall risk of bias.
- b. Serious imprecision: 95% CI around the absolute effect does not cross the null threshold, however the 95% CI includes both small to moderate harm
- c. Serious imprecision: 95% CI around the absolute effect does not cross the null threshold, however 95% CI includes both trivial to small harm
- d. Serious imprecision: 95% CI around the absolute effects does not cross the null threshold, however 95% CI includes both moderate to trivial harm.
- e. Serious imprecision: 95% CI around the absolute effect does not cross the null threshold, however 95% CI includes both small to moderate harm
- f. Serious imprecision: 95% CI around the absolute effect does not cross the null threshold, however 95% CI is large

Supplementary Table S5. Evidence Profile for comparison 2.a.1. (Enhanced commercially produced and/or imported FBFs vs locally produced FBFs)<sup>1</sup>

Population: Children with moderate wasting

Intervention: Enhanced FBFs

Comparison: Locally produced FBFs

Settings: Rural Mali, Uganda, Ethiopia

| Certainty assessment |              |              |               |              |             |                      | N of patients                                       |                       | Effect            |                   | Certainty | Importance |
|----------------------|--------------|--------------|---------------|--------------|-------------|----------------------|-----------------------------------------------------|-----------------------|-------------------|-------------------|-----------|------------|
| N of studies         | Study design | Risk of bias | Inconsistency | Indirectness | Imprecision | Other considerations | Enhanced commercially produced and/or imported FBFs | Locally produced FBFs | Relative (95% CI) | Absolute (95% CI) |           |            |

Recovery<sup>2</sup>

|   |                   |                      |             |             |                      |      |                 |                 |                           |                                                 |                                                                                            |          |
|---|-------------------|----------------------|-------------|-------------|----------------------|------|-----------------|-----------------|---------------------------|-------------------------------------------------|--------------------------------------------------------------------------------------------|----------|
| 4 | randomised trials | serious <sup>a</sup> | not serious | not serious | serious <sup>b</sup> | none | 482/692 (69.7%) | 649/943 (68.8%) | RR 0.96<br>(0.90 to 1.01) | 28 fewer per 1,000<br>(from 69 fewer to 7 more) | <br>Low | CRITICAL |
|---|-------------------|----------------------|-------------|-------------|----------------------|------|-----------------|-----------------|---------------------------|-------------------------------------------------|--------------------------------------------------------------------------------------------|----------|

WHZ at the end of the intervention period<sup>3</sup>

|   |                   |                      |                      |             |                      |      |                                  |                                  |   |                                                    |                                                                                                   |          |
|---|-------------------|----------------------|----------------------|-------------|----------------------|------|----------------------------------|----------------------------------|---|----------------------------------------------------|---------------------------------------------------------------------------------------------------|----------|
| 3 | randomised trials | serious <sup>a</sup> | serious <sup>c</sup> | not serious | serious <sup>d</sup> | none | 530<br>Mean (SD): -0.25<br>(2.2) | 781<br>Mean (SD): -0.21<br>(2.2) | - | MD <b>0.04 lower</b><br>(0.29 lower to 0.2 higher) | <br>Very low | CRITICAL |
|---|-------------------|----------------------|----------------------|-------------|----------------------|------|----------------------------------|----------------------------------|---|----------------------------------------------------|---------------------------------------------------------------------------------------------------|----------|

WAZ at the end of the intervention period

|   |                   |                      |             |             |                      |      |                                  |                                   |   |                                                    |                                                                                              |          |
|---|-------------------|----------------------|-------------|-------------|----------------------|------|----------------------------------|-----------------------------------|---|----------------------------------------------------|----------------------------------------------------------------------------------------------|----------|
| 1 | randomised trials | serious <sup>a</sup> | not serious | not serious | serious <sup>c</sup> | none | 100<br>Mean (SD): -2.2<br>(0.82) | 104<br>Mean (SD): -1.94<br>(0.69) | - | MD <b>0.27 lower</b><br>(0.48 lower to 0.07 lower) | <br>Low | CRITICAL |
|---|-------------------|----------------------|-------------|-------------|----------------------|------|----------------------------------|-----------------------------------|---|----------------------------------------------------|----------------------------------------------------------------------------------------------|----------|

| Certainty assessment |              |              |               |              |             |                      | № of patients                                       |                       | Effect            |                   | Certainty | Importance |
|----------------------|--------------|--------------|---------------|--------------|-------------|----------------------|-----------------------------------------------------|-----------------------|-------------------|-------------------|-----------|------------|
| № of studies         | Study design | Risk of bias | Inconsistency | Indirectness | Imprecision | Other considerations | Enhanced commercially produced and/or imported FBFs | Locally produced FBFs | Relative (95% CI) | Absolute (95% CI) |           |            |

### HAZ at the end of the intervention period

|   |                   |                      |             |             |                           |      |                         |                         |   |                                                    |                                                                                                 |          |
|---|-------------------|----------------------|-------------|-------------|---------------------------|------|-------------------------|-------------------------|---|----------------------------------------------------|-------------------------------------------------------------------------------------------------|----------|
| 2 | randomised trials | serious <sup>a</sup> | not serious | not serious | very serious <sup>f</sup> | none | 188<br>Mean (SD): -2.23 | 194<br>Mean (SD): -2.07 | - | MD <b>0.17 lower</b><br>(0.4 lower to 0.07 higher) | <br>Very low | CRITICAL |
|---|-------------------|----------------------|-------------|-------------|---------------------------|------|-------------------------|-------------------------|---|----------------------------------------------------|-------------------------------------------------------------------------------------------------|----------|

**MUAC gain in cm over the intervention period**

|   |                   |                      |                      |             |                          |      |                       |                        |   |                                                      |                                                                                            |          |
|---|-------------------|----------------------|----------------------|-------------|--------------------------|------|-----------------------|------------------------|---|------------------------------------------------------|--------------------------------------------------------------------------------------------|----------|
| 2 | randomised trials | serious <sup>a</sup> | serious <sup>b</sup> | not serious | not serious <sup>h</sup> | none | 504<br>Mean (SD): 0.9 | 749<br>Mean (SD): 0.84 | - | MD <b>0.06 higher</b><br>(0.13 lower to 0.25 higher) | <br>Low | CRITICAL |
|---|-------------------|----------------------|----------------------|-------------|--------------------------|------|-----------------------|------------------------|---|------------------------------------------------------|--------------------------------------------------------------------------------------------|----------|

**Weight gain over the 12-week intervention period in kg**

|   |                   |                      |             |             |                          |      |                        |                        |   |                                                       |                  |          |
|---|-------------------|----------------------|-------------|-------------|--------------------------|------|------------------------|------------------------|---|-------------------------------------------------------|------------------|----------|
| 3 | randomised trials | serious <sup>a</sup> | not serious | not serious | not serious <sup>b</sup> | none | 604<br>Mean (SD): 1.13 | 853<br>Mean (SD): 1.01 | - | MD <b>0.13 higher</b><br>(0.05 higher to 0.21 higher) | ⊕⊕⊕○<br>Moderate | CRITICAL |
|---|-------------------|----------------------|-------------|-------------|--------------------------|------|------------------------|------------------------|---|-------------------------------------------------------|------------------|----------|

**Height gain over the 12-week intervention period in cm**

|   |                   |                      |                      |             |                          |      |                        |                       |   |                                                      |                                                                                            |          |
|---|-------------------|----------------------|----------------------|-------------|--------------------------|------|------------------------|-----------------------|---|------------------------------------------------------|--------------------------------------------------------------------------------------------|----------|
| 3 | randomised trials | serious <sup>a</sup> | serious <sup>j</sup> | not serious | not serious <sup>b</sup> | none | 604<br>Mean (SD): 2.91 | 853<br>Mean (SD):2.87 | - | MD <b>0.05 higher</b><br>(0.19 lower to 0.29 higher) | <br>Low | CRITICAL |
|---|-------------------|----------------------|----------------------|-------------|--------------------------|------|------------------------|-----------------------|---|------------------------------------------------------|--------------------------------------------------------------------------------------------|----------|

**Sustained recovery – Not reported**

[illegible]Deterioration to severe wasting<sup>4</sup>

| Certainty assessment |                   |              |               |              |                           |                      | № of patients                                       |                       | Effect                  |                                              | Certainty   | Importance |
|----------------------|-------------------|--------------|---------------|--------------|---------------------------|----------------------|-----------------------------------------------------|-----------------------|-------------------------|----------------------------------------------|-------------|------------|
| № of studies         | Study design      | Risk of bias | Inconsistency | Indirectness | Imprecision               | Other considerations | Enhanced commercially produced and/or imported FBFs | Locally produced FBFs | Relative (95% CI)       | Absolute (95% CI)                            |             |            |
| 1                    | randomised trials | not serious  | not serious   | not serious  | very serious <sup>i</sup> | none                 | 4/162 (2.5%)                                        | 2/162 (1.2%)          | RR 2.00 (0.37 to 10.77) | 12 more per 1,000 (from 8 fewer to 121 more) | ⊕⊕○○<br>Low | IMPORTANT  |

#### Time to recovery (days)

|   |                   |                      |                           |             |                           |      |                        |                        |   |                                                   |                  |           |
|---|-------------------|----------------------|---------------------------|-------------|---------------------------|------|------------------------|------------------------|---|---------------------------------------------------|------------------|-----------|
| 2 | randomised trials | serious <sup>a</sup> | very serious <sup>k</sup> | not serious | very serious <sup>l</sup> | none | 369<br>Mean (SD): 51.6 | 512<br>Mean (SD): 61.6 | - | MD <b>9.98 lower</b> (21.93 lower to 1.96 higher) | ⊕○○○<br>Very low | IMPORTANT |
|---|-------------------|----------------------|---------------------------|-------------|---------------------------|------|------------------------|------------------------|---|---------------------------------------------------|------------------|-----------|

#### Non-response

|   |                   |                      |             |             |                      |      |                 |                 |                               |                                                      |             |           |
|---|-------------------|----------------------|-------------|-------------|----------------------|------|-----------------|-----------------|-------------------------------|------------------------------------------------------|-------------|-----------|
| 2 | randomised trials | serious <sup>a</sup> | not serious | not serious | Serious <sup>m</sup> | none | 125/430 (29.1%) | 227/677 (33.5%) | <b>RR 0.91</b> (0.76 to 1.10) | <b>30 fewer per 1,000</b> (from 80 fewer to 34 more) | ⊕⊕○○<br>Low | IMPORTANT |
|---|-------------------|----------------------|-------------|-------------|----------------------|------|-----------------|-----------------|-------------------------------|------------------------------------------------------|-------------|-----------|

#### Relapse – not measured

|   |   |   |   |   |   |   |   |   |   |   |   |           |
|---|---|---|---|---|---|---|---|---|---|---|---|-----------|
| - | - | - | - | - | - | - | - | - | - | - | - | IMPORTANT |
|---|---|---|---|---|---|---|---|---|---|---|---|-----------|

<sup>1</sup> Abbreviations used in the table: **CI**: confidence interval; **MD**: mean difference; **RR**: risk ratio; <sup>2</sup> Criteria for recovery across studies varied. Out of the 4 studies included, one defined recovery as having reached a WHZ > -2 and adding 10% of their admission weight for two consecutive visits (Amegovu et al., 2014), one as reaching a MUAC ≥ 12.5cm and/or WHZ ≥ -2 without bipedal edema at the end of 12 weeks (Nane et al., 2021); one study defined recovery as reaching a WHZ > -2.0 (Kajjura et al., 2019) and one as reaching a WHZ ≥ -2 and MUAC ≥ 12.5cm at two consecutive follow-up visits (Ackatiah-Armah et al., 2014); <sup>3</sup> One study measured change in WHZ throughout the intervention period (Ackatiah-Armah et al., 2014) and two studies measured WHZ at endline ( Amegovu et al., 2014; Kajjura et al., 2019); <sup>4</sup>Children who remained MAM in the 12 week intervention period; <sup>5</sup>Developing SAM during the 12 week intervention period based either on WHZ < -3, MUAC < 11.5cm and oedema;

## Explanations for Evidence GRADE

- Serious risk of bias: majority or all information is from studies at high or unclear overall risk of bias.
- Serious imprecision: the 95% CI around the absolute effect crosses the null threshold, including both a small harm and trivial benefit.
- Serious inconsistency: considerable heterogeneity I<sup>2</sup>=87%
- Serious imprecision: the 95% CI around the absolute effect considerably crosses the null threshold, including both appreciable benefit and harm.
- Serious imprecision: the 95% CI around the absolute effect does not cross the null threshold but OIS is modestly breached.
- Very serious imprecision: the 95% CI around the absolute effect crosses the null threshold, and includes both a large harm and a trivial benefit.
- Serious inconsistency: considerable heterogeneity I<sup>2</sup>=76%.
- No imprecision: trivial difference and 95% CI (effect is not clinically meaningful)
- Serious inconsistency: Considerable heterogeneity I<sup>2</sup>=77%.
- Very serious imprecision: the 95% CI around the absolute effect crosses the null threshold, and includes both trivial benefit and moderate harm.

k. Very serious inconsistency; substantial heterogeneity  $I^2=95\%$ .

m. Serious imprecision: the 95% CI around the absolute effect considerably crosses the null threshold, including a small harm and trivial benefit.

**Supplementary Table S6. Evidence Profile for comparison 2b.1 (RUTF vs RUSF)<sup>1,2</sup>**

Population: 6-59 months old children with moderate wasting

Intervention: RUTF

## Comparison: RUSF

## Settings: Kenya and South Sudan

| Certainty assessment                                                                                  |                   |                      |               |              |                          |                      | № of patients   |                 | Effect                 |                                              | Certainty                                                                                       | Importance |
|-------------------------------------------------------------------------------------------------------|-------------------|----------------------|---------------|--------------|--------------------------|----------------------|-----------------|-----------------|------------------------|----------------------------------------------|-------------------------------------------------------------------------------------------------|------------|
| № of studies                                                                                          | Study design      | Risk of bias         | Inconsistency | Indirectness | Imprecision              | Other considerations | RUTF            | RUSF            | Relative (95% CI)      | Absolute (95% CI)                            |                                                                                                 |            |
| Anthropometric recovery- Number of children who achieved a MUAC ≥125mm during the intervention period |                   |                      |               |              |                          |                      |                 |                 |                        |                                              |                                                                                                 |            |
| 1                                                                                                     | randomised trials | Serious <sup>a</sup> | not serious   | not serious  | not serious <sup>b</sup> | none                 | 860/995 (86.4%) | 773/908 (85.1%) | RR 1.02 (0.98 to 1.05) | 17 more per 1,000 (from 17 fewer to 43 more) | <br>Moderate | CRITICAL   |
| Deterioration to severe wasting – not reported                                                        |                   |                      |               |              |                          |                      |                 |                 |                        |                                              |                                                                                                 |            |
| -                                                                                                     | -                 | -                    | -             | -            | -                        | -                    | -               | -               | -                      | -                                            | -                                                                                               | CRITICAL   |
| WHZ at endline (after 4 months) – not reported                                                        |                   |                      |               |              |                          |                      |                 |                 |                        |                                              |                                                                                                 |            |
| -                                                                                                     | -                 | -                    | -             | -            | -                        | -                    | -               | -               | -                      | -                                            | -                                                                                               | CRITICAL   |
| WAZ at endline (after 4 months) – not reported                                                        |                   |                      |               |              |                          |                      |                 |                 |                        |                                              |                                                                                                 |            |



| Certainty assessment |              |              |               |              |             |                      | № of patients |      | Effect            |                   | Certainty | Importance |
|----------------------|--------------|--------------|---------------|--------------|-------------|----------------------|---------------|------|-------------------|-------------------|-----------|------------|
| № of studies         | Study design | Risk of bias | Inconsistency | Indirectness | Imprecision | Other considerations | RUTF          | RUSF | Relative (95% CI) | Absolute (95% CI) |           |            |

**HAZ at endline (after 4 months) – not reported**

[illegible]

**MUAC in cm at endline (after 4 months)**

|   |                   |                      |             |             |                      |      |                                |                                |   |                                                    |                                                                                                 |          |
|---|-------------------|----------------------|-------------|-------------|----------------------|------|--------------------------------|--------------------------------|---|----------------------------------------------------|-------------------------------------------------------------------------------------------------|----------|
| 1 | randomised trials | serious <sup>a</sup> | not serious | not serious | serious <sup>b</sup> | none | 268<br>Mean (SD):13.3<br>(0.7) | 375<br>Mean (SD):13.4<br>(0.7) | - | MD <b>0.1 lower</b><br>(0.21 lower to 0.01 higher) | <br>Moderate | CRITICAL |
|---|-------------------|----------------------|-------------|-------------|----------------------|------|--------------------------------|--------------------------------|---|----------------------------------------------------|-------------------------------------------------------------------------------------------------|----------|

**Weight gain in g/kg/day over the 4 months intervention period**

|   |                   |                      |             |             |                      |      |                               |                                |   |                                                      |                                                                                            |          |
|---|-------------------|----------------------|-------------|-------------|----------------------|------|-------------------------------|--------------------------------|---|------------------------------------------------------|--------------------------------------------------------------------------------------------|----------|
| 1 | randomised trials | serious <sup>a</sup> | not serious | not serious | serious <sup>c</sup> | none | 268<br>Mean (SD):1.7<br>(0.8) | 375<br>Mean (SD): 1.5<br>(0.7) | - | MD <b>0.2 higher</b><br>(0.08 higher to 0.32 higher) | <br>Low | CRITICAL |
|---|-------------------|----------------------|-------------|-------------|----------------------|------|-------------------------------|--------------------------------|---|------------------------------------------------------|--------------------------------------------------------------------------------------------|----------|

Height in cm at endline (after 4 months)

|   |                   |                      |             |             |                      |      |                                |                                 |   |                                                    |                                                                                            |          |
|---|-------------------|----------------------|-------------|-------------|----------------------|------|--------------------------------|---------------------------------|---|----------------------------------------------------|--------------------------------------------------------------------------------------------|----------|
| 1 | randomised trials | serious <sup>a</sup> | not serious | not serious | serious <sup>d</sup> | none | 268<br>Mean (SD):76.6<br>(6.3) | 375<br>Mean (SD): 77.2<br>(5.5) | - | MD <b>0.6 lower</b><br>(1.54 lower to 0.34 higher) | <br>Low | CRITICAL |
|---|-------------------|----------------------|-------------|-------------|----------------------|------|--------------------------------|---------------------------------|---|----------------------------------------------------|--------------------------------------------------------------------------------------------|----------|

**Sustained recovery – data not shown**

[illegible]

**Non-response – data not shown**

[illegible]

| Certainty assessment      |              |              |               |              |             |                      | N <sup>o</sup> of patients |                  | Effect            |                   | Certainty | Importance |
|---------------------------|--------------|--------------|---------------|--------------|-------------|----------------------|----------------------------|------------------|-------------------|-------------------|-----------|------------|
| N <sup>o</sup> of studies | Study design | Risk of bias | Inconsistency | Indirectness | Imprecision | Other considerations | RUT <sup>a</sup>           | RUS <sup>a</sup> | Relative (95% CI) | Absolute (95% CI) |           |            |

Time to recovery (days) – data not shown

|   |   |   |   |   |   |   |   |   |   |   |   |           |
|---|---|---|---|---|---|---|---|---|---|---|---|-----------|
| - | - | - | - | - | - | - | - | - | - | - | - | IMPORTANT |
|---|---|---|---|---|---|---|---|---|---|---|---|-----------|

Relapse (number of recovered children relapsing to MAM or SAM)

|   |                   |                      |             |             |                      |      |               |                |                                  |                                                         |             |           |
|---|-------------------|----------------------|-------------|-------------|----------------------|------|---------------|----------------|----------------------------------|---------------------------------------------------------|-------------|-----------|
| 1 | randomised trials | serious <sup>a</sup> | not serious | not serious | serious <sup>c</sup> | none | 21/218 (9.6%) | 39/318 (12.3%) | <b>RR 0.79</b><br>(0.48 to 1.30) | <b>26 fewer per 1,000</b><br>(from 64 fewer to 37 more) | ⊕⊕○○<br>Low | IMPORTANT |
|---|-------------------|----------------------|-------------|-------------|----------------------|------|---------------|----------------|----------------------------------|---------------------------------------------------------|-------------|-----------|

<sup>1</sup> Abbreviations: CI: confidence interval; MD: mean difference; RR: risk ratio;

Explanations for Evidence GRADE

- a. Serious risk of bias: all information is from a sub-sample in a trial with some concerns for overall risk of bias.
- b. No imprecision: trivial difference and 95% CI (effect is not clinically meaningful)
- c. Serious imprecision: 95% CI around the absolute effect does not cross null threshold, however it ranges from a trivial to small difference.
- d. Serious imprecision: the 95% CI around the absolute effect crosses the null threshold and includes small harm and trivial benefit.
- e. Serious imprecision: the 95% CI around the absolute effect crosses the null threshold and includes a small benefit and trivial harm.
