# Supplementary material for: Effectiveness of Dietary Management for Moderate Wasting among Children > 6 Months of Age—A Systematic Review and Meta-Analysis Exploring Different Types, Quantities, and Durations
Source: Nutrients. 2023 Feb 21;15(5):1076. doi: 10.3390/nu15051076 (PMC10005276; doi:10.3390/nu15051076)
Supplement: Supplementary file 1 [file nutrients-15-01076-s001.zip]

Archive with 4 entries (4 files):
- Annex 1. PRISMA_2020_checklist.pdf
- Annex 2. Supplementary Figures S1-S45_Subquestion 1.pdf
- Annex 3. Supplementary Figures S46_Subquestion 2.pdf
- Annex 4. Supplementary Tables.pdf
